# Supplementary material for: PP2A Controls Genome Integrity by Integrating Nutrient-Sensing and Metabolic Pathways with the DNA Damage Response
Source: PubMed Central journal article supplement — Mol Cell. 2017 Jul 20;67(2):266–281.e4. doi: 10.1016/j.molcel.2017.05.027 (PMC5526790; doi:10.1016/j.molcel.2017.05.027), 2017-07-20

# Molecular Cell

## PP2A Controls Genome Integrity by Integrating Nutrient-Sensing and Metabolic Pathways with the DNA Damage Response

### Graphical Abstract

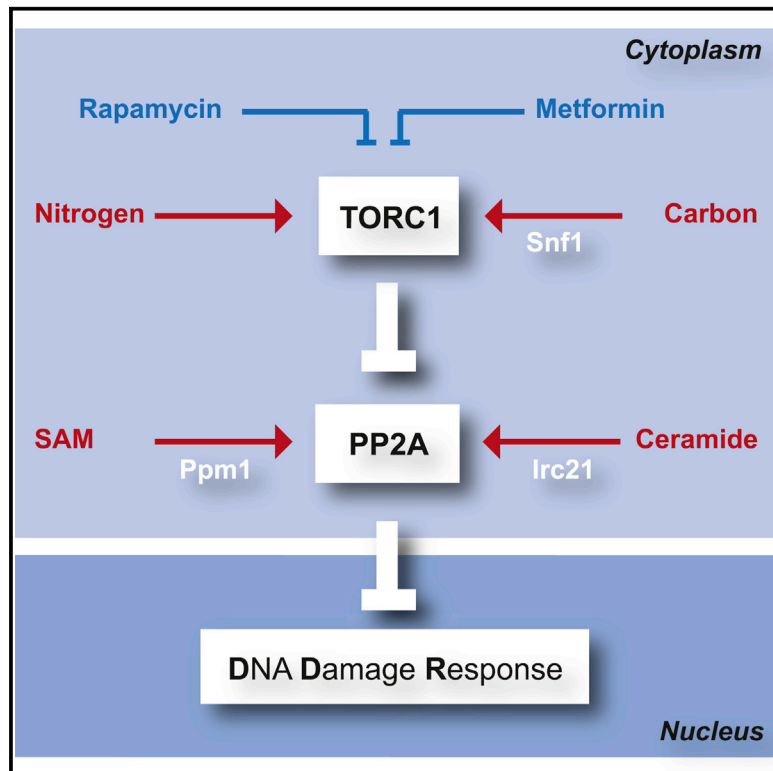

### Authors

Elisa Ferrari, Christopher Bruhn, Marta Peretti, ..., Saverio Minucci, Maria Pia Longhese, Marco Foiani

### Correspondence

marco.foiani@ifom.eu

### In Brief

Ferrari et al. provide a model wherein cytoplasmic metabolic pathways (the TORC1-Tap42, Ceramide-Irc21, and SAM-Ppm1 axes) converge on PP2A and PP2A-like phosphatases to modulate the nuclear DNA damage response. This reveals a connection between cell metabolism and genome stability surveillance mechanisms.

### Highlights

- PP2A counteracts the DNA damage response
- Cytochrome b5-like Irc21 attenuates the DDR through ceramide-induced PP2A activation
- The TORC1-Tap42 axis contributes to DDR activation through PP2A inhibition
- The SAM-Ppm1 pathway attenuates the DDR by activating PP2A

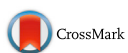

# PP2A Controls Genome Integrity by Integrating Nutrient-Sensing and Metabolic Pathways with the DNA Damage Response

Elisa Ferrari,<sup>1</sup> Christopher Bruhn,<sup>1</sup> Marta Peretti,<sup>1</sup> Corinne Cassani,<sup>2</sup> Walter Vincenzo Carotenuto,<sup>1</sup> Mohamed Elgendy,<sup>3</sup> Ghadeer Shubassi,<sup>1</sup> Chiara Lucca,<sup>1</sup> Rodrigo Bermejo,<sup>4</sup> Mario Varasi,<sup>1</sup> Saverio Minucci,<sup>3,5</sup> Maria Pia Longhese,<sup>2</sup> and Marco Foiani<sup>1,5,6,\*</sup>

<sup>1</sup>Fondazione Istituto FIRC di Oncologia Molecolare, Via Adamello 16, 20139 Milan, Italy

<sup>2</sup>Università degli Studi di Milano-Bicocca, 20126 Milan, Italy

<sup>3</sup>Istituto Europeo di Oncologia, Via Adamello 16, 20139 Milan, Italy

<sup>4</sup>Centro de Investigaciones Biológicas (CIB-CSIC), 28040 Madrid, Spain

<sup>5</sup>Università degli Studi di Milano, 20133 Milan, Italy

<sup>6</sup>Lead Contact

\*Correspondence: [marco.foiani@ifom.eu](mailto:marco.foiani@ifom.eu)

<http://dx.doi.org/10.1016/j.molcel.2017.05.027>

## SUMMARY

Mec1<sup>ATR</sup> mediates the DNA damage response (DDR), integrating chromosomal signals and mechanical stimuli. We show that the PP2A phosphatases, ceramide-activated enzymes, couple cell metabolism with the DDR. Using genomic screens, metabolic analysis, and genetic and pharmacological studies, we found that PP2A attenuates the DDR and that three metabolic circuits influence the DDR by modulating PP2A activity. *Irc21*, a putative cytochrome b5 reductase that promotes the condensation reaction generating dihydroceramides (DHCs), and Ppm1, a PP2A methyltransferase, counteract the DDR by activating PP2A; conversely, the nutrient-sensing TORC1-Tap42 axis sustains DDR activation by inhibiting PP2A. Loss-of-function mutations in *IRC21*, *PPM1*, and PP2A and hyperactive *tap42* alleles rescue *mec1* mutants. Ceramides synergize with rapamycin, a TORC1 inhibitor, in counteracting the DDR. Hence, PP2A integrates nutrient-sensing and metabolic pathways to attenuate the Mec1<sup>ATR</sup> response. Our observations imply that metabolic changes affect genome integrity and may help with exploiting therapeutic options and repositioning known drugs.

## INTRODUCTION

Tel1<sup>ATM</sup> and Mec1<sup>ATR</sup> mediate DNA damage checkpoints (Harri-son and Haber, 2006) by activating the Chk1<sup>CHK1</sup> and Rad53<sup>CHK2</sup> kinases, which transduce the signal to downstream targets. Rad53 controls replication fork integrity and phosphorylates Dun1 to upregulate deoxy-nucleotide triphosphate (dNTP) levels (Bashkirov et al., 2003; Sogo et al., 2002). Checkpoint deactivation occurs during recovery or adaptation and is mediated by the

PP1, PP2C, and PP4 phosphatases (Bazzi et al., 2010; Keogh et al., 2006; Leroy et al., 2003; O'Neill et al., 2007). Hydroxyurea (HU) inhibits replication by limiting dNTPs, causing replication stress and Mec1 activation (Slater, 1973; Sun et al., 1996).

PP2A and PP2A-like Ser/Thr phosphatases are ceramide-activated protein phosphatases (CAPPs) (Janssens and Goris, 2001; Jiang, 2006; Nickels and Broach, 1996). *PPH21* and *PPH22* encode PP2A catalytic subunits, whereas Tpd3 is a scaffolding subunit. The Cdc55 and Rts1 regulatory subunits are mutually exclusive and direct PP2As to distinct processes. The Ppm1 methyltransferase methylates and activates PP2A. Sit4 is a PP2A-like phosphatase that interacts with four activators known as Sit4-associating proteins (Saps). Pph21/Pph22 and Sit4 interact with Tap42, a target of TOR complex 1 (TORC1) (Di Como and Arndt, 1996). Rrd2 and Rrd1 are PP2A- and PP2A-like activators. Tip41 inhibits Tap42, and their interaction is influenced by Ptc1 phosphatase. The PP2A/PP2A-like signaling pathways are not fully characterized (Düvel et al., 2003). According to the model, TORC1 phosphorylates Tap42, which inhibits PP2As; PP2A dephosphorylates TORC1 effectors (Loewith and Hall, 2011). Gln3, Npr1, Nnk1, and Rtg3 are PP2A targets involved in nitrogen and amino acid metabolism (Hughes Hallett et al., 2014). PP2A influences the ataxia telangiectasia mutated (ATM)-dependent DNA damage response (DDR) (Freeman and Monteiro, 2010).

We show that *Irc21*, a cytochrome b<sub>5</sub>-like enzyme influencing genome stability (Alvaro et al., 2007; Gallego et al., 2010; Gué-nolé et al., 2013; Lee et al., 2005) activates PP2A by promoting the synthesis of dihydroceramide (DHC) and that PP2A is a central hub in a regulatory loop that couples three metabolic pathways dependent on *Irc21*, Ppm1 and TORC1, with the ataxia telangiectasia and Rad3-related (ATR)-mediated DDR.

## RESULTS

### *Irc21* Influences the Replication Stress Response

We identified *irc21Δ* as suppressor of the HU sensitivity of the dominant-negative *rad53-D339A* and the kinase-deficient

*rad53-K227A* mutations (Bermejo et al., 2011; Fay et al., 1997). The suppression was validated in the W303 (Thomas and Rothstein, 1989) background (Figures 1A and 1B). *irc21Δ* also rescued the HU sensitivity of the *mec1Δ sml1Δ*, *rad53Δ sml1Δ*, *mec1Δ rad53Δ sml1Δ*, and *chk1Δ rad53Δ sml1Δ* strains (Figure 1C). Sml1 inhibits ribonucleotide reductase and its ablation bypasses the essential functions of *MEC1* and *RAD53* by increasing dNTP levels (Desany et al., 1998; Huang et al., 1998; Zhao et al., 1998). *IRC21* and *SML1* double ablation caused an additive suppression in a *rad53-K227A* background (Figure S1A), and *irc21Δ* mutants were hypersensitive to high HU doses (Figure S1B), suggesting that *irc21Δ* suppression does not depend on dNTP levels or intrinsic HU resistance.

We addressed whether *IRC21* deletion influenced the Mec1-dependent Rad53 phosphorylation and dephosphorylation (Fiorani et al., 2008; Sanchez et al., 1996) during checkpoint activation and deactivation (Figure 1D). *sml1Δ*, *mec1Δ sml1Δ*, *irc21Δ sml1Δ*, and *mec1Δ irc21Δ sml1Δ* mutants were released from G<sub>1</sub> into HU to activate Mec1 and released into medium without HU to recover (Pelliccioli et al., 1999). In *sml1Δ* cells, Rad53 phosphorylation was obvious in HU and decreased during recovery. Rad53 phosphorylation was nearly abolished in *mec1Δ sml1Δ* mutants. *IRC21* deletion restored Rad53 phosphorylation in *mec1Δ sml1Δ* cells and also delayed Rad53 dephosphorylation in *sml1Δ* mutants. The persistence of Rad53 phosphorylation in *mec1Δ irc21Δ sml1Δ* mutants recovering from HU correlated with the inability to efficiently complete S phase (Figure S1C). We addressed whether *irc21Δ*-mediated rescue of Rad53 phosphorylation in *mec1Δ* cells was dependent on Tel1, which phosphorylates Mre11 and shares overlapping functions with Mec1 (Usui et al., 2001). Rad53 was not phosphorylated in *mec1Δ tel1Δ irc21Δ sml1Δ* cells exposed to HU (Figure 1E), suggesting that the *irc21Δ*-mediated rescue of Rad53 phosphorylation in *mec1Δ* cells depends on Tel1. The *irc21Δ* suppression mechanism was not due to Tel1 hyperactivation because *IRC21* deletion did not further elevate Tel1-dependent Mre11 phosphorylation (Ira et al., 2004; Figure 1E).

*irc21Δ* did not rescue the HU sensitivity of *dun1Δ* mutants (Figure S1D), further suggesting that Irc21 does not cause an increase in dNTP pools. Moreover, *IRC21* deletion failed to fully phosphorylate Dun1 in *mec1* or *rad53* mutants (Figure S1E). Hence, the Tel1-mediated Rad53 phosphorylation in *sml1Δ mec1Δ* mutants is somewhat suboptimal because it prevents Rad53 from phosphorylating Dun1. This is consistent with the notion that certain phospho-isoforms of Rad53 are unable to phosphorylate Dun1 (Lee et al., 2003). *irc21Δ* mutants failed to efficiently recover from the HU treatment, as visualized by the fluorescence-activated cell sorting (FACS) profile and by the delayed dephosphorylation of Rad53 and Dun1 (Figure S1F).

### Irc21 Affects Mitochondrial Functions and Lipid Biosynthesis

Irc21 contains an NADH-cytochrome b<sub>5</sub> reductase domain (CBR); CBRs are involved in mitochondrial functions and lipid biosynthesis (Figure 2A). We measured the oxygen consumption rate of logarithmically growing cells and found that *irc21Δ* mutants showed a higher respiration rate compared with wild-type (WT)

cells (Figure 2B). During respiration, mitochondria generate reactive oxygen species (ROS). Using the oxidant-sensing probe 2',7'-dichlorodihydrofluorescein diacetate (DCFH-DA) to measure ROS levels (Davidson et al., 1996), we found that exponentially growing *irc21Δ* cells accumulated more ROS than WT cells (Figure 2C), as shown previously (Neklesa and Davis, 2008). Consistent with higher respiration activity, *irc21Δ* cells were hypersensitive to paraquat (1,1'-dimethyl-4,4'-bipyridinium dichloride), a redox cyclor that stimulates respiration-dependent superoxide production (Cochemé and Murphy, 2009; Figure 2D). This did not reflect general ROS sensitivity because *irc21Δ* cells were resistant to *tert*-butyl hydroperoxide (t-BOOH), which produces ROS and damages a variety of cellular constituents, including lipids (Girotti, 1998; Figure 2D). In agreement with putative Irc21 CBR activity, *irc21Δ* cells were resistant to mersalyl, a mercurial diuretic that affects mitochondrial functions and inhibits the NADH-cytochrome b<sub>5</sub> reductase (Bernardi and Azzone, 1981; Figure 2D). The cytochrome b<sub>5</sub>-dependent electron transport system is also involved in lipid metabolic processes such as cholesterol/ergosterol biosynthesis and desaturation and elongation of fatty acids (Vergères and Waskell, 1995). In particular, heme is required for the enzymatic activities of Erg3p (sterol C5-6 desaturase), Erg5p (sterol C22-23 desaturase), and Erg11p (sterol 14 $\alpha$ -demethylase). We analyzed the sensitivity of *irc21Δ* cells to inhibition of Cyb5-dependent Erg11 by fluconazole and Cyb5-independent Erg1 (squalene epoxidase) by terbinafine (Kontoyiannis, 2000; Lamb et al., 1999; Petranyi et al., 1984; Figure 2D). *irc21Δ* cells were specifically sensitive to fluconazole and not to terbinafine, suggesting that *IRC21* ablation exacerbates the inhibitory effect of fluconazole on ergosterol synthesis. Fatty acid metabolism involves Cytb5-dependent reactions. We tested whether *irc21Δ* cells were sensitive to overall dampening of fatty acid production by cerulenin, an inhibitor of fatty acid synthase (FAS) that prevents the synthesis of medium- and long-chain fatty acids (MCFAs and LCFAs, respectively) and of very-LCFAs (VLCFAs) (Awaya et al., 1975). *irc21* mutants were hypersensitive to cerulenin (Figure 2D), implying that Irc21 may affect fatty acid metabolism. Taken together, the sensitivity/resistance profile suggests that Irc21 influences CBR-dependent processes.

### *irc21Δ* and PP2A Mutants Genetically Interact and Exhibit Similar Interactome Profiles

We compared the *irc21Δ* genetic interaction signatures with those of 3,884 other deletion strains (Costanzo et al., 2010) by calculating correlation scores (R) based on genetic interactions with 1,712 mutants. Among the top ten array strains with synthetic genetic array (SGA) interactomes most similar to *irc21Δ* mutants, we identified deletions in the *RRD1* (R = 0.39), *TIP41* (R = 0.33), *SAP185* (R = 0.19), and *RRD2* (R = 0.17) genes (Figures 3A and S2A), which encode PP2A and PP2A-like regulators (Luke et al., 1996; Van Hoof et al., 2005; Figure 3E). The interactome correlation between *irc21Δ* and *rrd1Δ* was quantitatively similar to the one between the two PP2A/PP2A-like activators *rrd1Δ* and *tip41Δ* (R = 0.37). The second hit with an *irc21Δ* interactome correlation similar to *rrd1Δ* was *imp2'Δ* (R = 0.38) (Figure S2A), in which the open reading frame (ORF) next to *RRD1* is disrupted; likely, *imp2'Δ* impairs *RRD1* expression and, thus, PP2A-like functionality. This is consistent with the high similarity

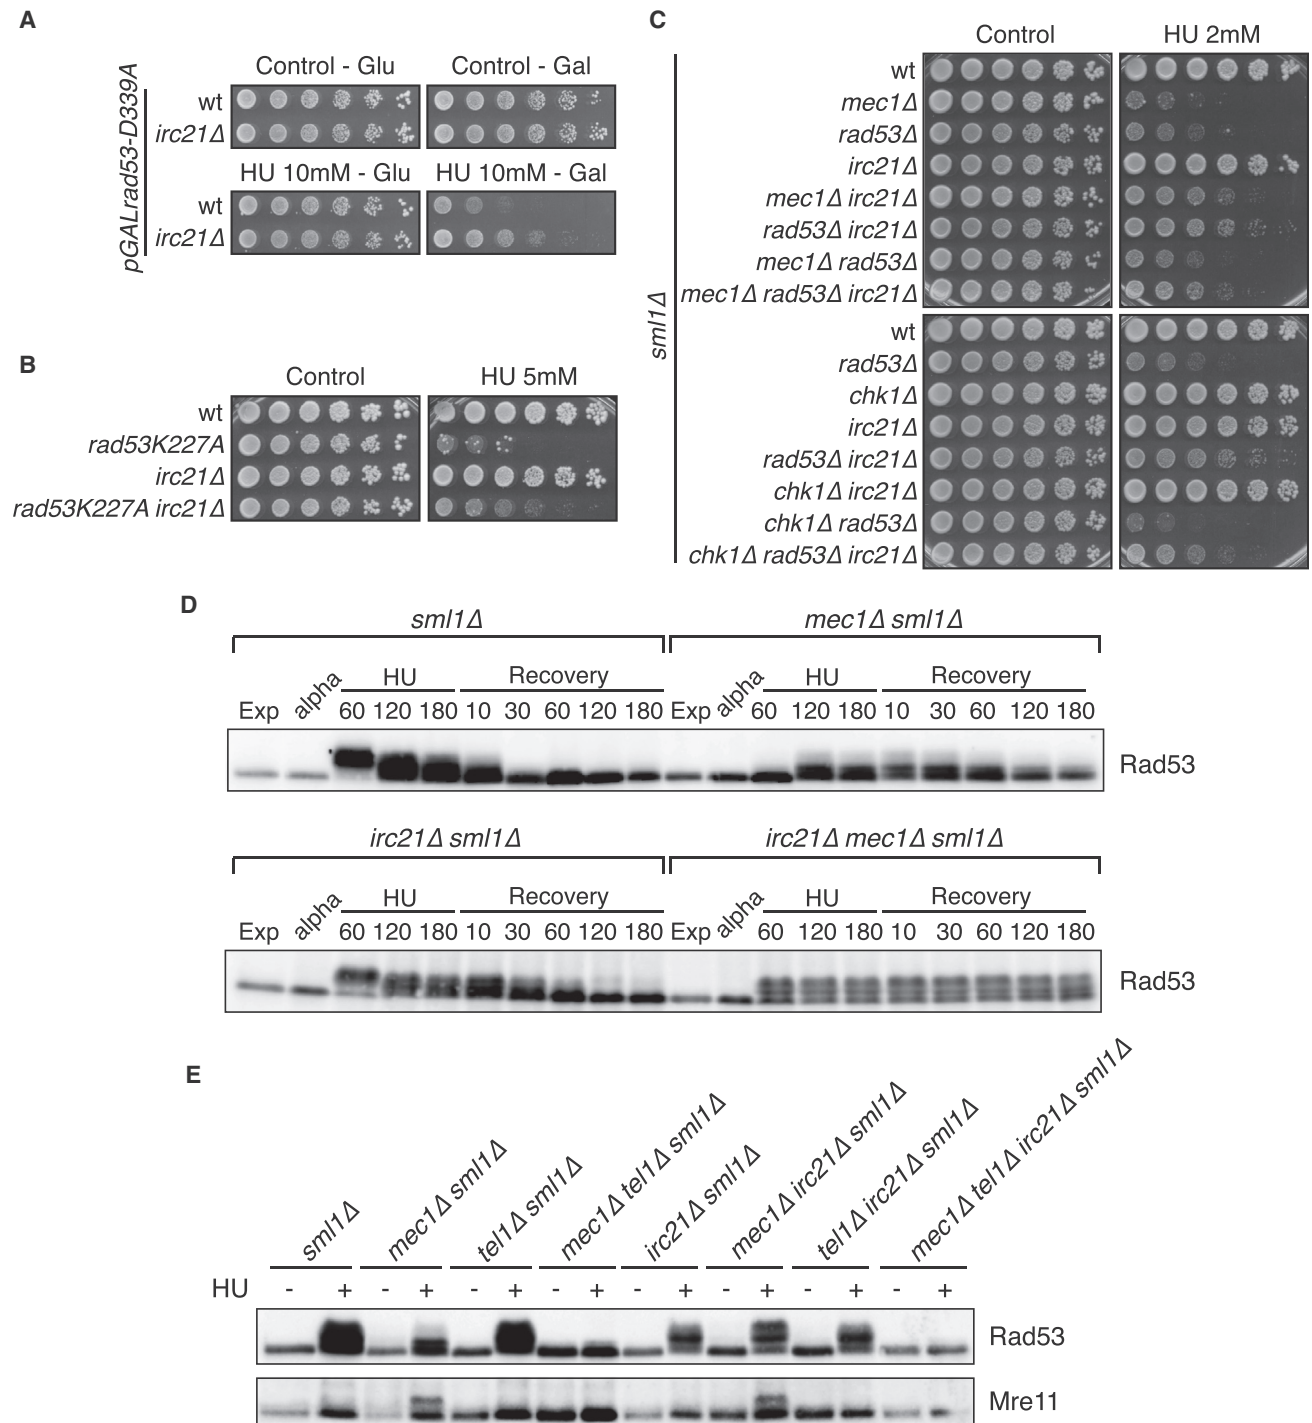

**Figure 1. IRC21 Deletion Rescues Checkpoint Mutants**

(A) Cells were grown on synthetic-defined (SD/-Ura) plates with glucose 2% or galactose 2% ± hydroxyurea (HU).

(B and C) Cells were grown on YPD plates with or without 5 mM HU (B) or 2 mM HU (C).

(D) *sml1Δ*, *sml1Δ mec1Δ*, *sml1Δ irc21Δ*, and *sml1Δ mec1Δ irc21Δ* cells were arrested in G<sub>1</sub> with  $\alpha$ -factor (alpha) and released into YPD containing 0.2 M HU. After 3 hr, cells were released into YPD. Samples were collected at the indicated times to detect Rad53 by western blot analysis.

(E) Cells were arrested with  $\alpha$ -factor and released in YPD with or without 0.2 M HU. Cells were treated for 3 hr, and samples were collected to detect Rad53 and Mre11.

See also Figure S1.

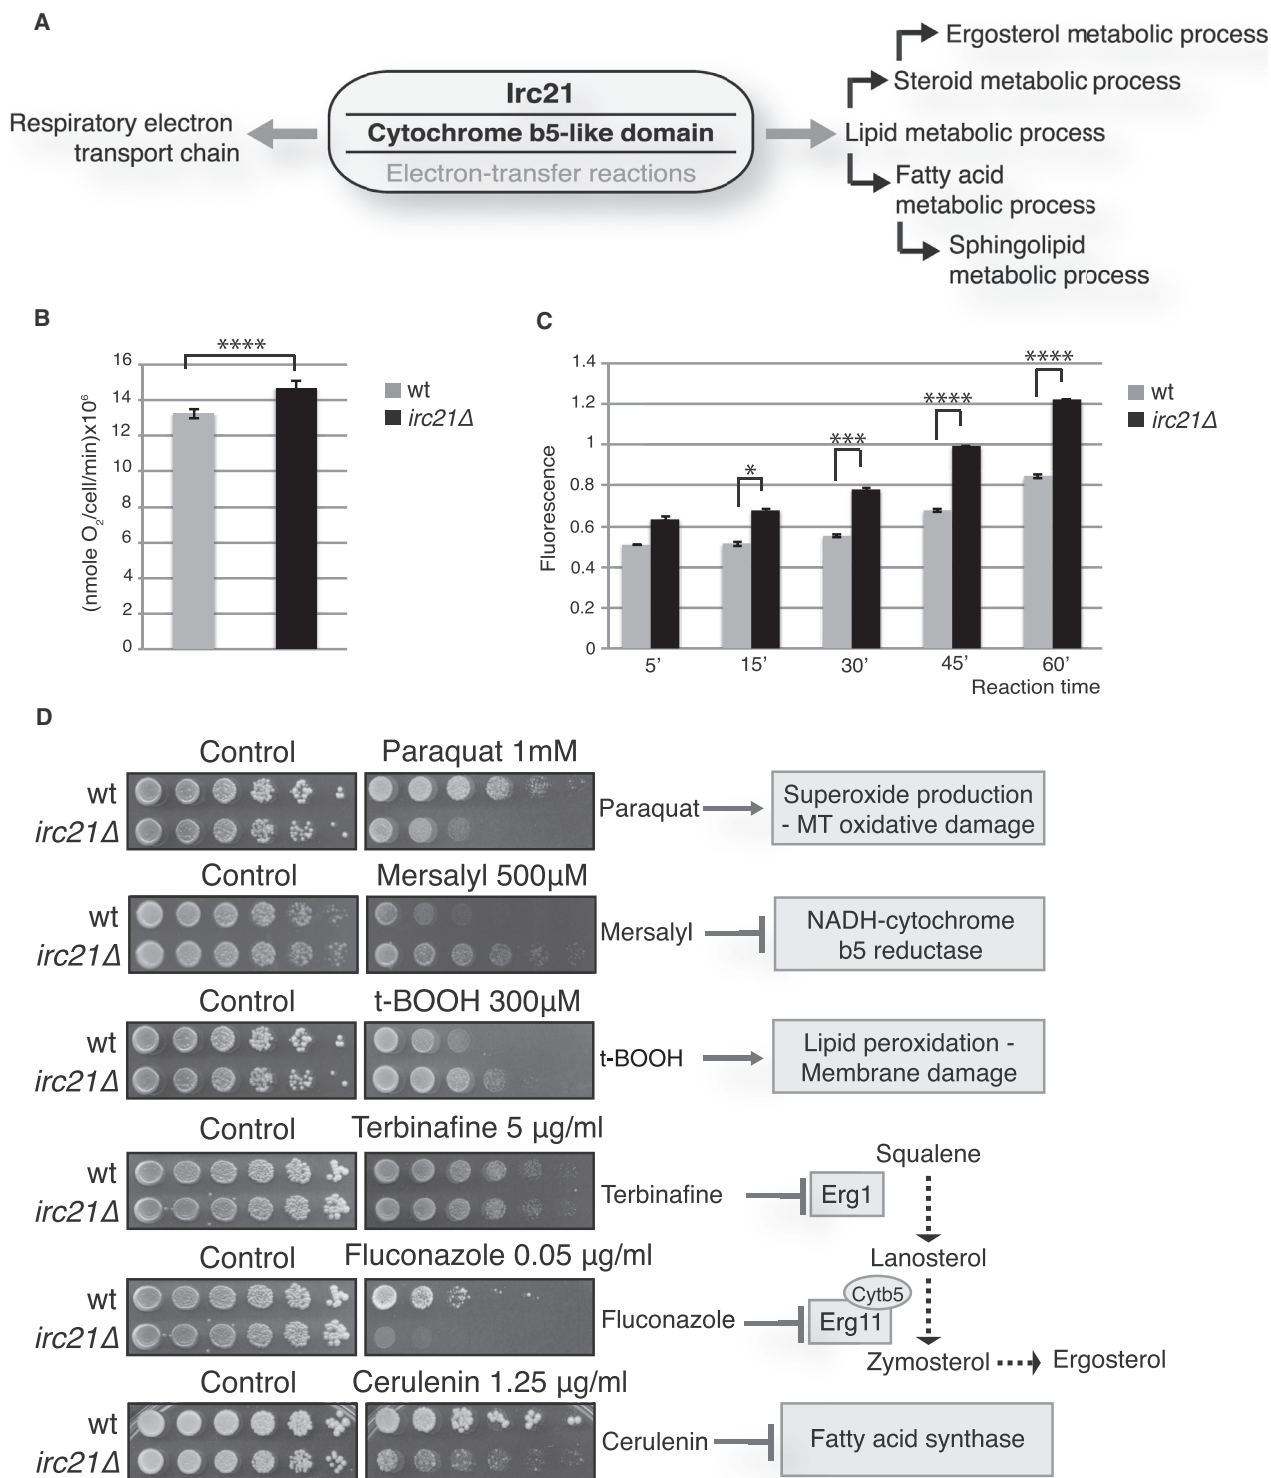

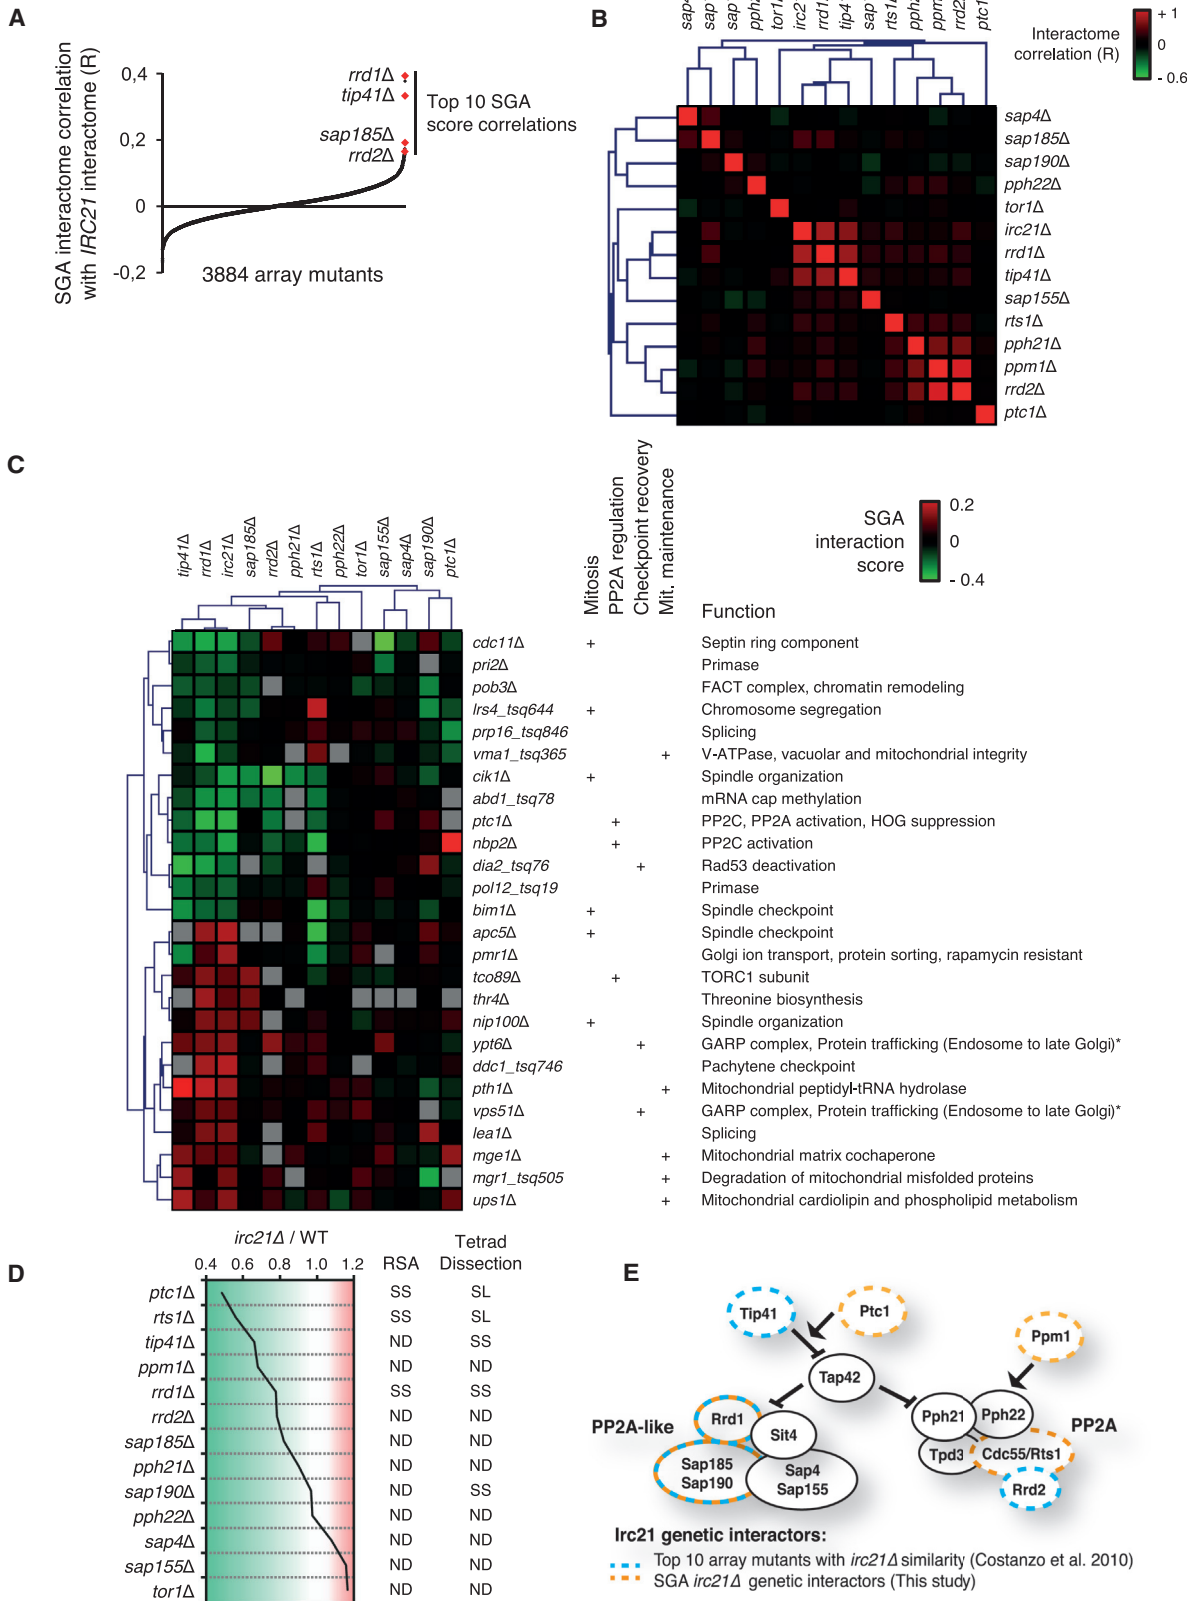

(legend on next page)

of *rrd1Δ* and *imp2'Δ* interaction profiles (R = 0.69; data not shown). We also identified deletions in the genes encoding Bck2, involved in protein kinase C signaling (Lee et al., 1993); Rrm3, a replicative DNA helicase targeted by the Mec1-Rad53 pathway (Rossi et al., 2015; Torres et al., 2004); Rnh201, a ribonuclease H2 involved in Okazaki fragment processing (Qiu et al., 1999); and phosphatases Ptp2 and Pph3 (Guan et al., 1992; O'Neill et al., 2007). We compared the interactomes of *irc21Δ* and other PP2A and PP2A-like deletion mutants by calculating the pairwise interactome correlation scores and performed hierarchical clustering of R values (Figure 3B). The analysis revealed two clusters, the first containing *pph21Δ*, *ppm1Δ*, and *rrd2Δ* (loosely associated with *rts1Δ*) and the second containing *irc21Δ*, *rrd1Δ*, and *tip41Δ* (loosely associated with *sap155Δ*). These observations suggest that *irc21Δ* affects PP2A and PP2A-like phosphatase activities (Figure 3E). The signatures of genetic interactions shared between *irc21Δ* and either *rrd1Δ* or *tip41Δ* (Costanzo et al., 2010; Figure 3C) showed that common interactors were associated with PP2A/PP2A-like regulated processes, including mitosis, checkpoint recovery and adaptation, and mitochondrial maintenance. Other PP2A mutant strains, including *sap185Δ*, *rrd2Δ*, *rts1Δ*, *pph21Δ*, and *pph22Δ*, shared interactions with the *irc21Δ/rrd1Δ/tip41Δ* signatures to varying degrees (Figure 3C).

We conducted an independent SGA analysis mating the *irc21Δ* query strain to the haploid deletion library containing deletions of ~4,700 non-essential genes (Figure 3D; Tong et al., 2001). We found 42 negative and 12 positive interactions, causing, respectively, synthetic growth defects or suppression of the mild slow growth phenotype of *irc21Δ* mutants (Figure S2B). In addition, we identified five high-confidence epistatic interactors of *IRC21* by filtering potential epistatic interactors from our dataset, with the positive *IRC21* interactors previously reported in a genome-wide, high-throughput screen (Costanzo et al., 2010; Figure S3A).

Several PP2A/PP2A-like components displayed negative interactions with *irc21Δ* (significance, *ptc1Δ* and *rts1Δ*; trend, *tip41Δ*, *ppm1Δ*, *rrd1Δ*, and *rrd2Δ*) (Figures 3D and 3E). We confirmed some of these interactions by random spore analysis and/or tetrad dissection (Figures 3D, S3B, and S3C). The largest categories of *irc21Δ* negative genetic interactors were metabolic (oxidative stress, TCA cycle, and lipids), and chromatin/checkpoint pathways, which were related to PP2A. In accordance with previous observations (Figure 2D; cerulenin sensitivity assay), *irc21Δ* displayed negative genetic interaction with *FEN1* deletion (Figure S2B), encoding the fatty

acid elongase required for ceramide biosynthesis (Oh et al., 1997); moreover, ceramide hydroxylase Scs7, which contains a cytochrome b<sub>5</sub> domain like *Irc21* (Mitchell and Martin, 1997), was identified among the top five high-confidence *Irc21* epistatic interactors (Figure S3A). Rescuing interactors (Figure S2B) were involved in phospholipid (*PGC1*), sterol (*NSG2*), and respiratory (*RG12*, *TRX3*) metabolism, mitochondrial localization/inheritance (*JSN1*), cell morphology (*MGA1*, *DFG5*), nuclear membrane (*MLP2*), and genome integrity (*RAD51*). Epistatic interactors (Figure S3A) were involved in spindle and organelle positioning (*DYN3*, *NIP100*), mitochondrial localization/inheritance (*MMR1*), and ion transport (*PMR1*).

Overall, the *IRC21* interactome analysis supports a function for *Irc21* in mitochondrial and lipid metabolism and in influencing PP2A activity, nuclear morphology, and genome integrity.

### **Irc21 Is Involved in the TORC1-PP2A Regulatory Axis**

We next characterized the role of *Irc21* in regulating PP2A/PP2A-like activities, which are negatively regulated by the TORC1 pathway (Di Como and Arndt, 1996). We found that *tor1Δ* and *tco89Δ*, defective in TORC1 components, were positive interactors of *irc21Δ* (Figures 3C and 3D). TORC1 controls Tap42 and Sch9 through phosphorylation (Urban et al., 2007; Figure 4A). Sch9 influences translation initiation and G0 events. Tap42 regulates PP2A and PP2A-like phosphatases, which control the phosphorylation state of Msn2/Msn4, involved in stress response; Rtg1/3, implicated in the retrograde pathway; and Npr1 and Gln3, connected with amino acid synthesis and nitrogen assimilation (Hughes Hallett et al., 2014).

To probe the Tap42/PP2A signaling branch in *irc21Δ* mutants, we selected four PP2A targets that exhibit clear modifications following TORC1 inhibition through rapamycin treatment: Gln3, Nnk1, Npr1, and Rtg3 (Figure 4A). As expected, rapamycin led to dephosphorylation of the four PP2A targets; in contrast, all four targets remained hyper-phosphorylated in *irc21Δ*, *rrd1Δ*, and *tip41Δ* cells even in the presence of rapamycin (Figure 4A, left). Thus, *Irc21* participates in the activation of PP2A/PP2A-like pathways like *Rrd1* and *Tip41*. To discern whether *Irc21* activates PP2A directly or by inhibiting TORC1, we monitored the TORC1-Sch9 branch. Sch9 was normally dephosphorylated after rapamycin treatment in all mutant strains (Figure 4A, right). Hence, *Irc21* is specifically involved in the activation of the PP2A/PP2A-like sub-pathways, which are also regulated by TORC1. Accordingly, *irc21Δ* mutants are resistant to treatment with a variety of TORC1 inhibitors, such as rapamycin, caffeine,

### **Figure 3. Irc21 Interacts with PP2A and PP2A-like Phosphatases**

(A) Comparison of the interactome of the *irc21Δ* array strain with the interactomes of 3,884 mutant array strains by calculating the correlation (R) value of their interaction scores with the 1,712 query mutants (datasets from Costanzo et al., 2010).

(B) Heatmap representing pairwise interactome correlation values of mutants with altered PP2A activity.

(C) Heatmap representing SGA interaction scores between query mutants of the *irc21Δ* and *rrd1Δ* and *tip41Δ* signature (rows) and PP2A-related array mutants (columns). Gray fields indicate that the interaction score has not been determined.

(D) Genetic interactions of *IRC21* with PP2A components and regulators assessed by SGA screening. Left: quantitative effect of PP2A component deletions (rows) on the growth of *irc21Δ* mutants versus the WT. Right: summary of the confirmation of individual genetic interactions. SS, synthetic sick; SL, synthetic lethal. Interactions with *ppm1* and *tor1* were confirmed by gene targeting.

(E) Representation of PP2A and PP2A-like complex subunits and regulators (see text). The blue and orange dotted lines indicate *irc21Δ* mutant genetic interactors found in Costanzo et al. (2010) and in the present study, respectively.

See also Figures S2 and S3.

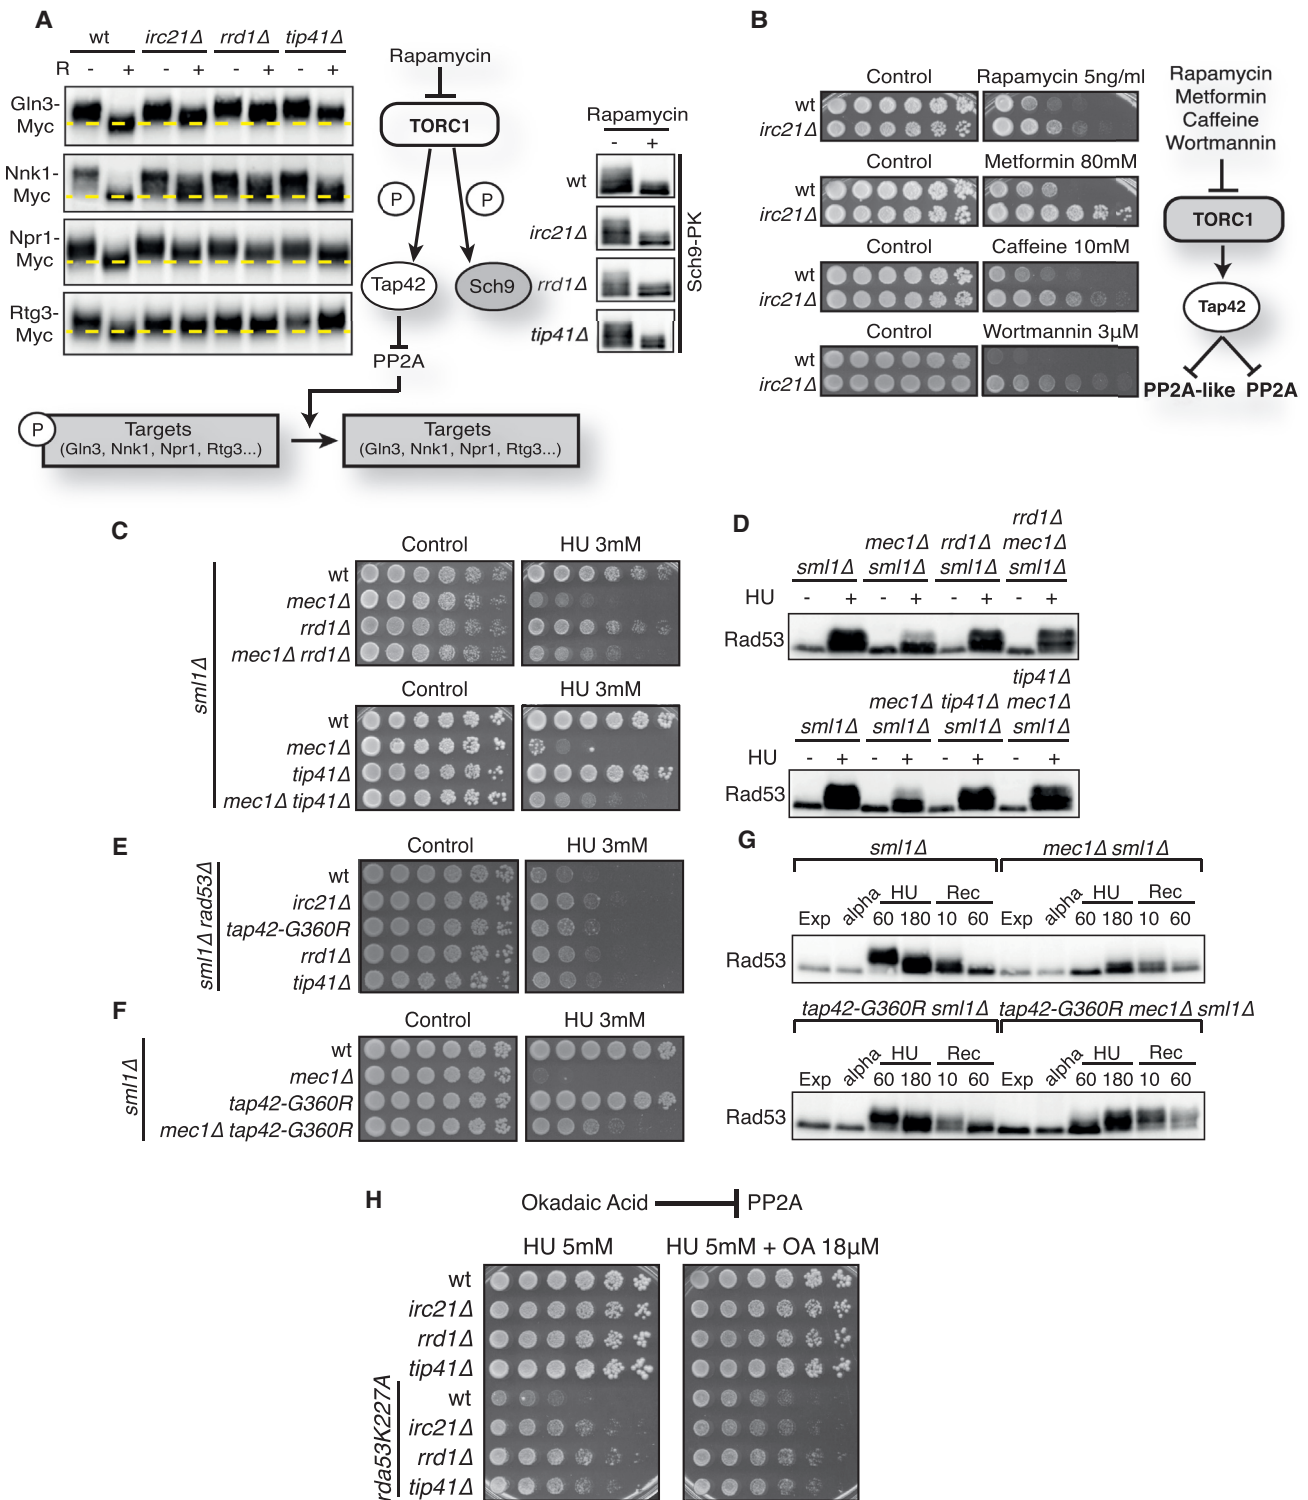

**Figure 4. Irc21 Inhibits DDR through PP2A Activation**

(A) Cells were treated with 200 ng/mL rapamycin. Left: band-shift assays following phosphorylation of the PP2A branch proteins Gln3, Nnk1, Npr1, and Rtg3 after 30 min of rapamycin treatment. A horizontal line has been overlaid to assist in determining mobility shifts. Right: band-shift assays following the phosphorylation of Sch9 after 2 hr of rapamycin treatment.

(B) WT and *irc21Δ* cells were grown on YPD plates with or without rapamycin, metformin, caffeine, and wortmannin (left). All drugs are inhibitors of the Torc1-Tap42 pathway, represented at the right.

(legend continued on next page)



metformin, and wortmannin (Figure 4B), in analogy to certain PP2A mutants (Rempola et al., 2000).

### PP2A Influences the Checkpoint Response

The previous observations led us to hypothesize that, similar to Irc21, PP2A and PP2A-like control the Rad53-mediated response to replication stress. Ablation of the PP2A-positive regulators *RRD1* and *TIP41* mimicked *irc21Δ* in suppressing the HU sensitivity of *rad53-D339A*, *rad53-K227A*, *rad53Δ sml1Δ*, and *mec1Δ sml1Δ* mutant alleles (Figures S4A, S4B, 4C, and 4E). Moreover, deletion of either *RRD1* or *TIP41* in a *mec1Δ sml1Δ* background was able to rescue the crippled Rad53 phosphorylation (Figure 4D), similar to *irc21Δ* (Figure 1D). *rrd1Δ* and *tip41Δ* also exhibited delayed Rad53 deactivation following recovery from HU, similar to *irc21Δ* mutants (data not shown).

We performed a screen to find spontaneous extragenic suppressors of *mec1-100* (Paciotti et al., 2001) lethality on HU and identified a mutation in *TAP42*. *tap42-G360R* rescued the HU sensitivity of *mec1Δ* and *rad53Δ* cells (Figures 4E and 4F) and abolished the defective Rad53 phosphorylation in HU-treated *mec1Δ sml1Δ* cells, mimicking the phenotype of *irc21Δ*, *rrd1Δ*, and *tip41Δ* (Figure 4G).

A gain-of-function mutation could account for the above results. To test whether the mutation caused a constitutive inhibition of PP2A, we analyzed the rapamycin and metformin sensitivity of *tap42-G360R* cells. As expected, and similar to *irc21Δ*, *rrd1Δ*, and *tip41Δ*, *tap42-G360R* mutants were partially resistant to both drugs (Figure S4C). Second, after rapamycin treatment, *tap42-G360R* cells showed defective Gln3, Nnk1, and Npr1 dephosphorylation (Figure S4D). Hence, the hyperactive Tap42 allele resembles the absence of PP2A activators.

Because PP2A appeared to target Rad53, we predicted that chemical compounds acting on PP2A activity should also affect *rad53* HU sensitivity. Low doses of okadaic acid (OA) cause selective inhibition of PP2A (Zhang et al., 1994) and partially rescued the HU sensitivity of *rad53-K227A* mutants (Figure 4H).

### Irc21 and PP2A Metabolic Signatures

To characterize the relationship between PP2A and Irc21, we compared the global mass spectrometry metabolic profile of WT, *irc21Δ*, and *rrd1Δ* cells during logarithmic growth in rich medium. Unsupervised clustering by metabolite fold changes clearly grouped the replicates of *irc21Δ* and *rrd1Δ* by genotype but also revealed a degree of similarity between both mutants (Figure 5A). Of a total of 484 examined compounds, 172 and 111 were significantly changed in *irc21Δ* and *rrd1Δ* cells, respectively (linear model for microarray data [LIMMA],  $p_{\text{adj}} = 0.05$ ) (Figure 5B). The two mutants shared a significant amount of metabolite alterations (79,  $p = 5 \times 10^{-11}$ ). Importantly, nearly all of these were co-regulations (72 of 79), suggesting that these 72 alterations define a metabolic, shared Irc21-PP2A signature

(Figure 5B). As expected for low PP2A activity (Staschke et al., 2010), the PP2A signature was characterized by a reduction of amino acid biosynthesis intermediates and dipeptides (Figure 5C, top). It also featured elevated levels of multiple lipids and lipid intermediates (long chain fatty acids, sterol biosynthesis intermediates, lyso-phospholipids, carnitine conjugates, sphingolipid precursors) and a shifted composition of phospholipids to a shorter fatty acid chain length (less than C18). Low PP2A activity correlated with high N-acetylglucosamine (GlcNAc) biosynthesis intermediates, high deoxy-nucleosides (but normal deoxy-nucleotides), and high levels of the methyl donor S-adenosyl-methionine (SAM).

The metabolite alterations in *irc21Δ* that are not shared by *rrd1Δ* represent PP2A-independent functions of Irc21. We found that several metabolites related to CBR function were altered in *irc21Δ* cells. Accumulation of trichloroacetic acid (TCA) cycle intermediates (aconitate,  $\alpha$ -ketoglutarate, fumarate, and malate) and a reduction in the late glycolysis intermediates and acetyl co-enzyme A (Ac-CoA) were indicative of altered mitochondrial activity (Figures 2A and 5C, bottom). The levels of several amino acids derived from glycolysis (Gly and Val) and TCA (Gln, Thr, and Lys) and their derivatives were reduced, whereas urea cycle products accumulated (ornithine, urea). Purine and pyrimidine ribonucleosides and ribonucleotides as well as cytidine triphosphate (CTP)-dependent phospholipid precursors were also reduced, whereas the nucleotide synthesis substrate phosphoribosyl pyrophosphate (PRPP) increased. Cytb5 is also involved in fatty acid metabolism (Figure 2A), and we found that although fatty acid accumulation was common to *irc21Δ* and *rrd1Δ*, VLCFAs, which are used in the synthesis of ceramides, accumulated in *irc21Δ* cells. Accumulation of VLCFAs and the genetic interaction with the VLCFA synthesis enzyme *FEN1* suggest that *irc21Δ* mutants inefficiently condense sphingolipids and VLCFAs into ceramides and, thus, fail to promote PP2A activation.

We performed a quantitative mass spectrometry analysis of ceramides and related lipid metabolites in WT and *irc21Δ* cells. DHC was more abundant than phytoceramides (PHCs) in WT cells (0.35 pmol/mg and 0.01 pmol/mg, respectively) (Figure S5A). Deletion of *IRC21* reduced the level of DHC (Figures 5D and S5A–S5C), whereas the DHC precursors 3-ketodihydrospingosine (3-keto-DHS), dihydrospingosine (DHS), dihydrospingosine-1-P (DHS-1-P), and VLCFA-CoA increased in *irc21Δ* cells (Figures 5C, 5D, and S5A–S5C). These observations confirmed that *IRC21* deletion impairs ceramide biosynthesis and that the defective step corresponds to the DHS-DHC conversion (Figures 5E and S5C). Accordingly, *irc21Δ* mutants were resistant to myriocin (Figure 5F), an inhibitor of ceramide synthesis acting on serine palmitoyltransferase (SPT), the first enzyme in the sphingolipid biosynthesis pathway (Figure S5C; Huang et al., 2012). Moreover, *irc21Δ* cells were resistant to syringomycin E (SRE) (Figure 5G; Takemoto et al., 1993), supporting a defect in sphingolipid biosynthesis

(C, E, and F) Cells were grown on YPD plates with or without 3 mM HU.

(D) Cells were arrested with  $\alpha$ -factor and released in YPD with or without 0.2 M HU. Cells were treated for 3 hr and harvested to detect Rad53.

(G) Cells were arrested in G<sub>1</sub> with  $\alpha$ -factor and released in YPD with 0.2 M HU. After 3 hr, cells were released into YPD. Samples were collected at the indicated times to detect Rad53.

(H) Cells were grown on YPD + HU plates with or without okadaic acid (OA).

See also Figure S4.

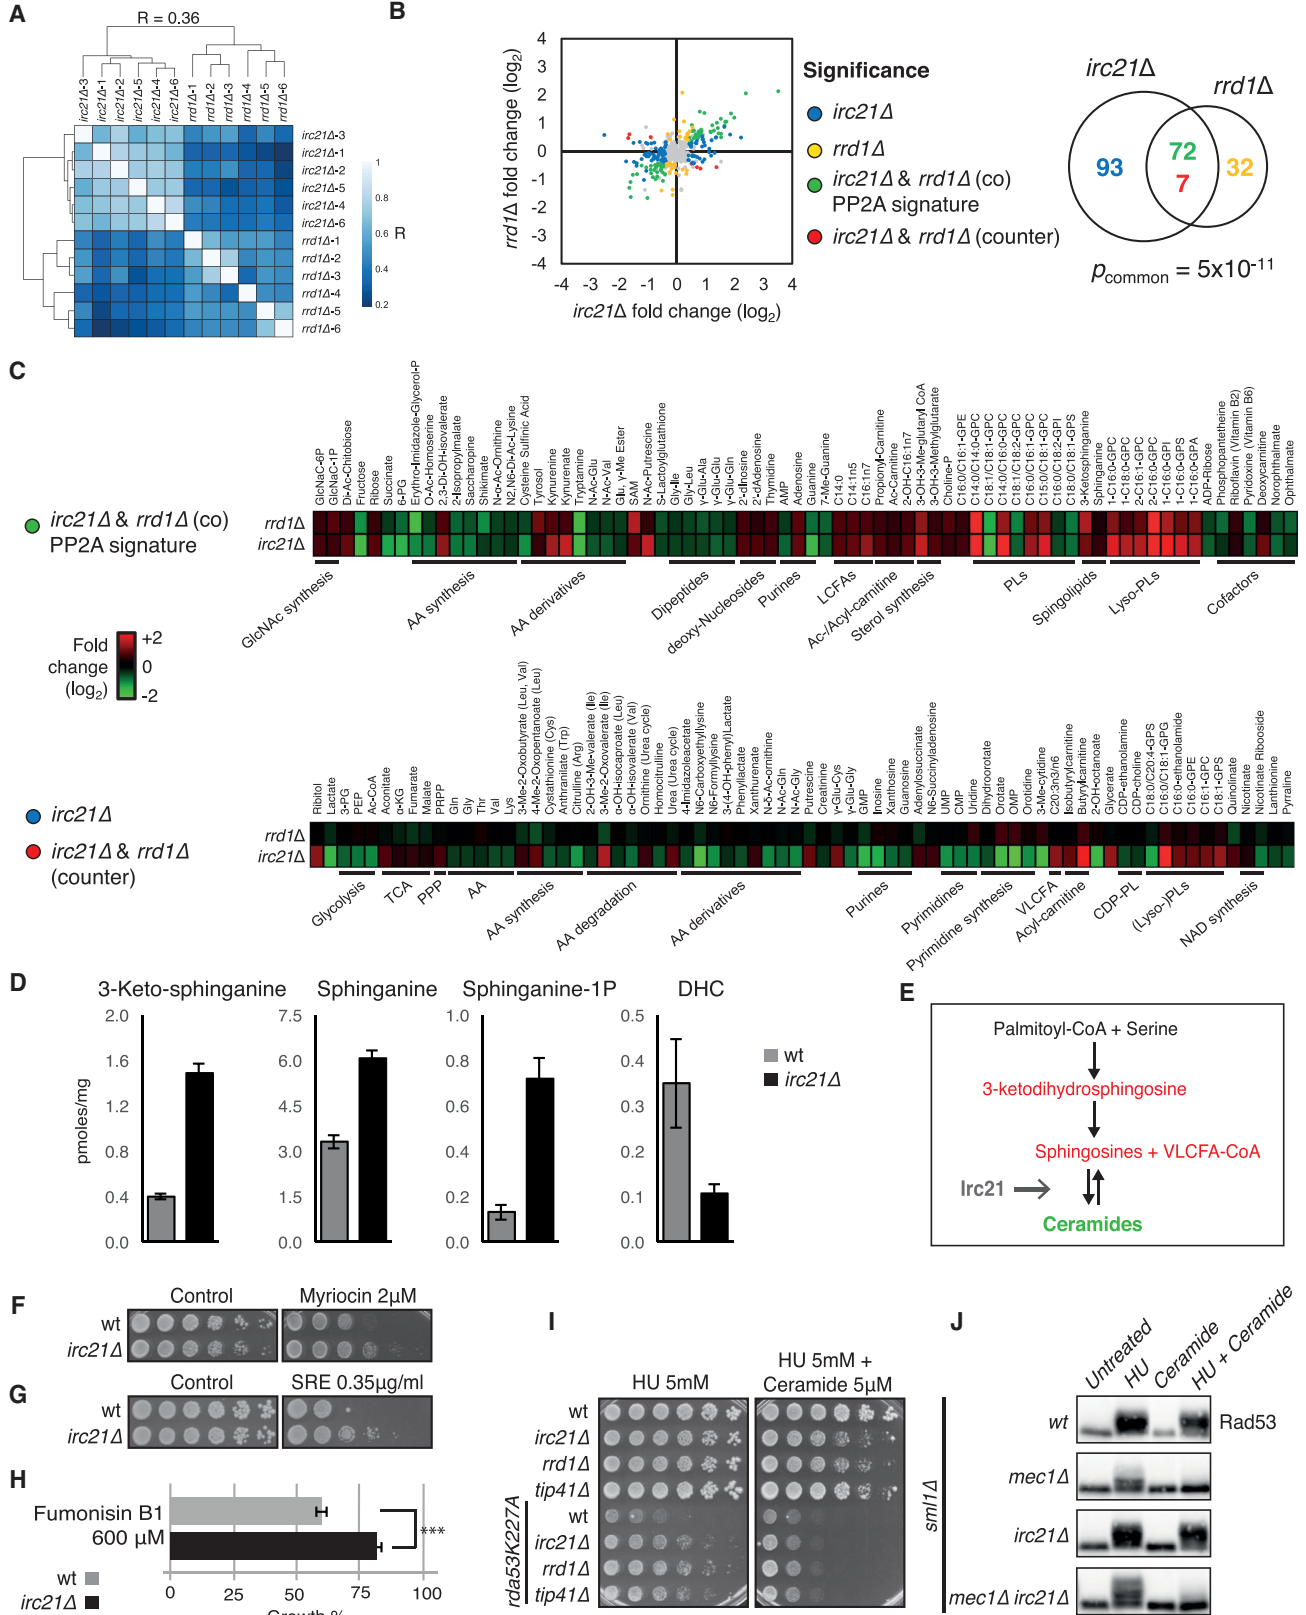

(legend on next page)

(Stock et al., 2000). Addition of exogenous DHC restored *irc21Δ* sensitivity to SRE (Figure S5D). Fumonisin B1, a ceramide synthase inhibitor, pheno-copies *irc21Δ* mutants by causing an increase in DHS and PHS levels and a concomitant decrease in ceramide and, therefore, DHC (Wu et al., 1995). *irc21Δ* mutants were resistant to fumonisin B1 (Figure 5H). This is consistent with the idea that the drug targets a pathway compromised in *irc21Δ* cells. We conclude that Irc21 promotes the condensation reaction leading to the formation of DHC.

### Ceramides, SAM-Mediated Methylation, and TORC1 Inhibition Attenuate the Checkpoint Response by Promoting PP2A Activation

We investigated the possibility to abrogate *irc21Δ* HU resistance and PP2A inactivity phenotypes by exogenously providing ceramide. It is known that the cell-permeable ceramide analog C<sub>2</sub>-ceramide induces a dose-dependent activation of PP2A in yeast (Nickels and Broach, 1996). We first analyzed the effect of exogenous ceramide on the rescue of *rad53-K227A* HU sensitivity by *irc21Δ*, *rrd1Δ*, and *tip41Δ*. The sphingolipid suppressed the HU resistance of all mutants (Figure 5I). We then asked whether ceramide was also able to suppress the *IRC21Δ*-dependent rescue of Rad53 phosphorylation in *mec1Δ* cells. Ceramide-mediated PP2A activation abolished Rad53 phosphorylation, specifically in *irc21Δ mec1Δ* cells, and reduced it in WT and *irc21Δ* cells (Figure 5J). In addition, ceramide caused Rad53 dephosphorylation during recovery from HU treatment in *irc21Δ mec1Δ* mutants (Figure S5E).

Sur2 and Scs7 are both required for ceramide hydroxylation and are members of the cytochrome b<sub>5</sub>-dependent enzyme family (Figure S5C; Haak et al., 1997). Scs7p contains a cytochrome b<sub>5</sub>-like domain, whereas cytochrome b<sub>5</sub> may function to transfer electrons to Sur2. Both *SCS7* and *SUR2* deletions partially rescued *mec1Δ sml1Δ* HU sensitivities (Figures 6A). Thus, defective cytochrome b<sub>5</sub>-dependent enzymes, involved in ceramide biosynthesis, have beneficial consequences for checkpoint mutants exposed to replication stress.

SAM levels are critical for methylation and activation of PP2A; in this process, Ppm1 methylates the C terminus of the PP2A catalytic subunit (Sutter et al., 2013). Accordingly, *PPM1* ablation

partially impaired dephosphorylation of PP2A targets (Figure S6A). We found a negative interaction between *IRC21* and *PPM1* (Figure 3D) and confirmed that *irc21Δ* and *ppm1Δ* are synthetic sick (Figure 6B). Moreover, *irc21Δ* and *rrd1Δ* mutants accumulate high levels of SAM (Figure 5C); accordingly, *irc21Δ* and *rrd1Δ* mutants were hypersensitive to SAM limitation caused by ethionine (a toxic analog of methionine) or cycloleucine (an inhibitor of methionine adenosyl transferase) (Figure 6C; data not shown). These results suggest that Irc21 and Ppm1 positively regulate PP2A through different mechanisms. Interestingly, like the deletion of *IRC21*, *PPM1* ablation rescued the HU sensitivity of *mec1Δ sml1Δ* mutants (Figure 6D) and partially recovered the Rad53-defective phosphorylation in HU-treated *mec1Δ* cells (data not shown).

Both rapamycin and ceramide have been shown to promote PP2A activity (Loewith et al., 2002; Nickels and Broach, 1996). We tested whether rapamycin and ceramide treatments could modulate the HU-induced DDR response. Cells were released from G<sub>1</sub> in the presence of HU alone or in combination with rapamycin and ceramide (Figure 6E). After 5 min, when Rad53 was still unphosphorylated, the concomitant presence of rapamycin and ceramide caused PP2A hyperactivation, as indicated by Nnk1 de-phosphorylation. At 60 min, Rad53 phosphorylation was evident in HU-treated cells, partial in HU + rapamycin and HU + ceramide, and abolished in HU + rapamycin and ceramide. We obtained analogous results by treating exponentially growing cells with HU in combination with rapamycin and/or ceramide (Figure S6B).

Altogether, these observations suggest that TORC1, Irc21, and Ppm1 influence the HU-induced DDR by regulating the activity of PP2A and that ceramide levels as well as SAM levels are crucial for Mec1 and Rad53 activation.

## DISCUSSION

Activation of Mec1<sup>ATR</sup> requires multiple post-translational modifications that integrate chromosomal signals and mechanical stimuli (Awasthi et al., 2016). Deactivation of Mec1<sup>ATR</sup> promotes cell-cycle recovery or adaptation (Bartek and Lukas, 2007). Fine-tuning of the Mec1<sup>ATR</sup> cascade prevents the deleterious

### Figure 5. Irc21 Exerts PP2A-Dependent and PP2A-Activating Metabolic Regulations

(A) Unsupervised hierarchical clustering of *irc21Δ* and *rrd1Δ* mutants (six replicates each) based on metabolome alterations during logarithmic growth in rich medium.

(B) Summary of metabolome alterations of *irc21Δ* and *rrd1Δ* mutants during logarithmic growth in rich medium. Left: scatterplot of quantitative alterations of individual metabolites in *irc21Δ* and *rrd1Δ* mutants compared with a congenic WT identifies *irc21Δ*-specific (blue), *rrd1Δ*-specific (yellow), common (green, PP2A signature), and opposite (red) regulations. Right: Venn diagram representation of the intersection of metabolic alterations in *irc21Δ* and *rrd1Δ* mutants and intersection significance p value determined by chi-square test.

(C) Heatmap representation of altered metabolites by signature. Top: PP2A signature (common alterations in *irc21Δ* and *rrd1Δ*). Bottom: specific regulations in *irc21Δ* and opposite regulations in *irc21Δ* and *rrd1Δ*. As indicated, metabolites were grouped by class.

(D) 3-keto-sphinganine, sphinganine, sphinganine-1p, and dihydroceramide were quantified in WT and *irc21Δ* cells. Average values are shown, and error bars represent SEM.

(E) Simplified scheme representing ceramide biosynthesis in *S. cerevisiae*. Colored metabolites indicate an increase (red) or a decrease (green) of their amount in *irc21Δ* cells.

(F) WT and *irc21Δ* cells were grown on YPD plates with or without myriocin.

(G) WT and *irc21Δ* cells were grown on YPD plates with or without syringomycin E.

(H) WT and *irc21Δ* cells were grown in SD medium with or without Fumonisin B1.

(I) Cells were grown on YPD + HU with or without ceramide.

(J) Cells were arrested in G<sub>1</sub> with  $\alpha$ -factor and released in YPD with or without 0.2 M HU, 15  $\mu$ M ceramide, or 0.2 M HU in combination with 15  $\mu$ M ceramide for 3 hr.

See also Figure S5.

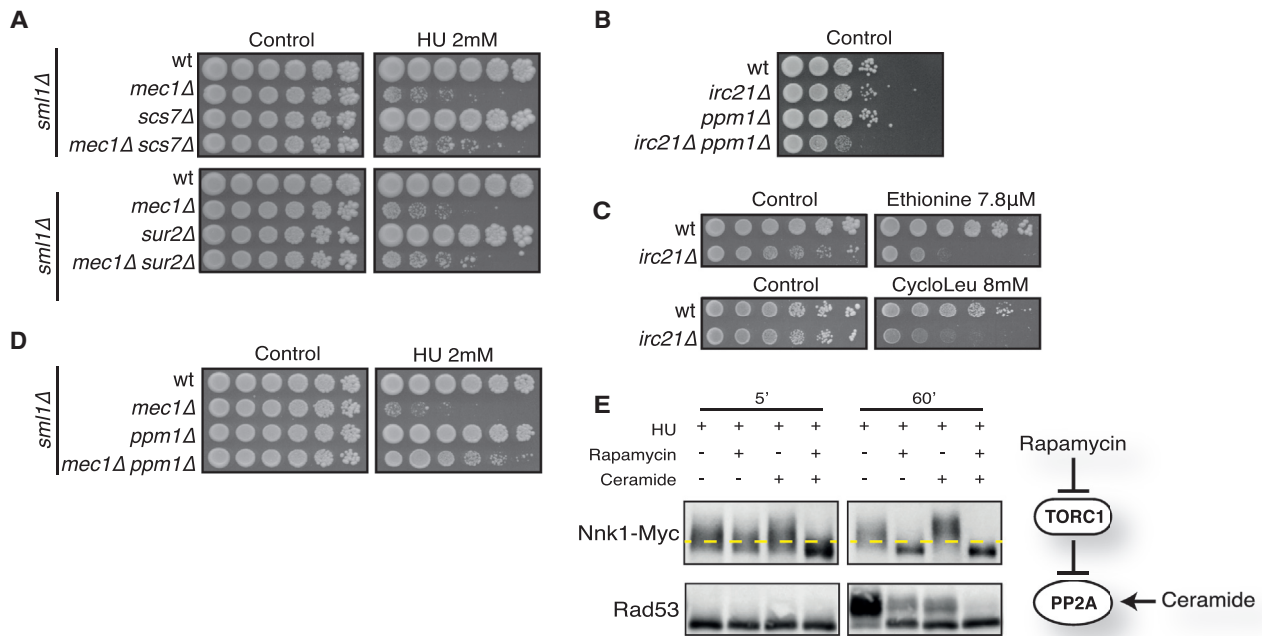

**Figure 6. Ceramides, TORC1, Irc21, and Ppm1 Affect the HU-Induced DDR by Modulating PP2A Activity**

(A and D) Cells were grown on YPD  $\pm$  HU.

(B) Cells were grown on YPD. 1:10 dilutions were used to highlight growth rate differences.

(C) WT and *irc21* $\Delta$  cells were grown on YPD plates with or without ethionine or cycloleucine.

(E) Cells were arrested with  $\alpha$ -factor and released into YPD containing 0.2 M HU alone or in combination with rapamycin (200 ng/mL), ceramide (15  $\mu$ M), or rapamycin (200 ng/mL) + ceramide (15  $\mu$ M). Cells were treated for 1 hr and harvested after 5 and 60 min to detect Nnk1 and Rad53.

See also Figure S6.

consequences of unscheduled checkpoint activation (Harrison and Haber, 2006). Mec1 and ATR regulate nuclear and non-nuclear pathways (Hilton et al., 2015; Kumar et al., 2014; Matsuoka et al., 2007). In yeast, several phosphatases have been involved in DDR silencing, including PP2C (Ptc2/Ptc3) and PP4 (Pph3-Psy2), required for double-strand break (DSB) recovery, and PP1 (Glc7), which promotes HU recovery (Bazzi et al., 2010; Keogh et al., 2006; Leroy et al., 2003; O'Neill et al., 2007). PP2A has been genetically linked to the *RAD53-MEC1* pathway but ruled out as one of the main phosphatases implicated in checkpoint control (Hustedt et al., 2015). PP2A shows activity toward  $\gamma$ H2AX, ATM, p53, Chk1, and Chk2 (Chen et al., 2015; Dozier et al., 2004; Goodarzi et al., 2004). Here we demonstrate that PP2A inactivation is beneficial when the Mec1-Rad53 axis is defective. Moreover, PP2A/PP2A-like act in a network with Irc21 and TORC1 to integrate metabolic signals with phosphorylation and dephosphorylation events outside and inside the nucleus and to attenuate the Mec1<sup>ATR</sup> cascade in cells experiencing replication stress.

*IRC21* ablation rescues *mec1* $\Delta$ , *rad53* $\Delta$ , and *chk1* $\Delta$  sensitivity to HU and promotes HU-induced Rad53 phosphorylation when Mec1 is absent through a process mediated by Tel1. Irc21 was previously connected to the DDR, but the mechanism remained unclear (Guénoilé et al., 2013).

Irc21 is an uncharacterized protein that consists of a cytochrome b5 domain; in accordance, *irc21* $\Delta$  mutants influence

the respiration rate and ROS levels, display resistance to mersalyl, and show metabolic alterations related to CBR functions. Interestingly, Irc21 localization is mainly cytoplasmic (Guénoilé et al., 2013; Huh et al., 2003), although a fraction has been detected in the nucleus (Guénoilé et al., 2013), in mitochondria and vacuoles (collection of yeast cells and localization patterns [CYCLOPs]; Koh et al., 2015). A key question is how Irc21 influences the checkpoint response.

We show that Irc21 positively regulates PP2A/PP2A-like activities. *IRC21* ablation causes resistance to TORC1 inhibitors but does not influence the TORC1-Sch9 axis, suggesting that Irc21 is not likely to act upstream of TORC1. The relationship between PP2A and TORC1 is complex and controversial. TORC1 negatively regulates PP2A/PP2A-like through Tap42 phosphorylation (Di Como and Arndt, 1996), whereas PP2A stimulates TORC1 through Npr2 phosphorylation (Laxman et al., 2014). *irc21* $\Delta$  mutants exhibit a negative genetic interaction with PP2A/PP2A-like activators (Rrd1, Rrd2, Tip41, Saps, and Ppm1) and positive genetic interactions with TORC1 components (Tco89 and Tor1) (Figure 7). We speculate that *IRC21* ablation ameliorates TORC1-defective mutants by limiting PP2A/PP2A-like activities.

We propose that Irc21 stimulates PP2A and, therefore, attenuates the DDR. Indeed, genetic and pharmacological inactivation of PP2A ameliorates the defective response to replication stress of checkpoint mutants. In addition, exogenous ceramide causes Rad53 dephosphorylation during recovery from HU

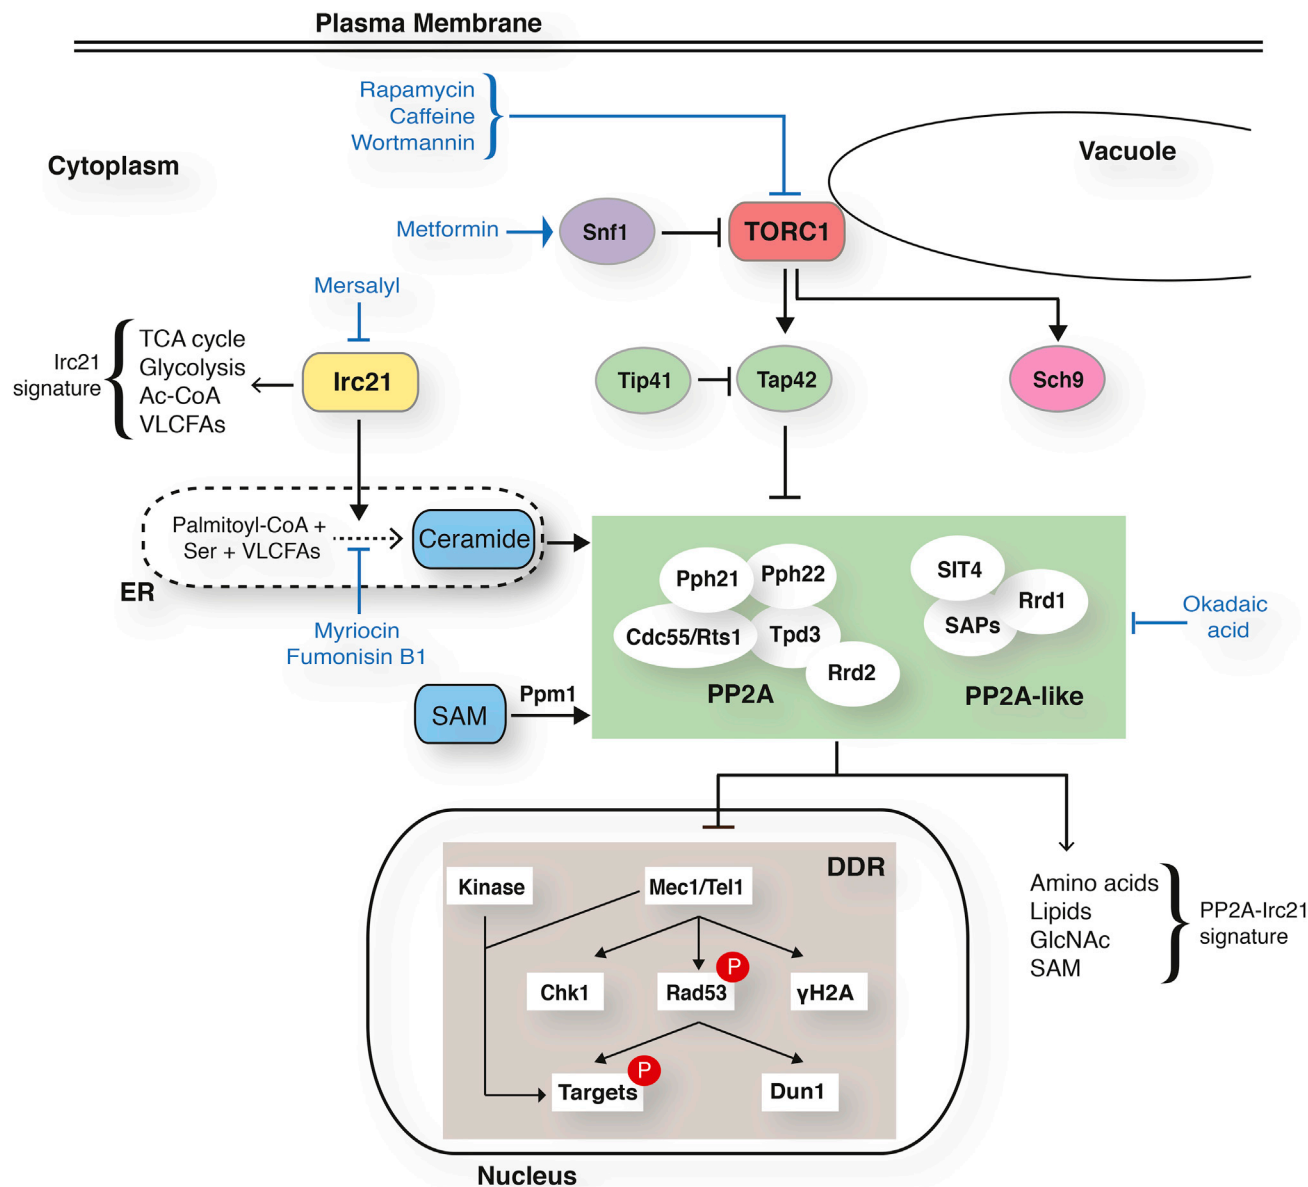

**Figure 7. Model: PP2A Links the DDR with Cell Metabolism**

PP2A and PP2A-like phosphatases are regulated by TORC1 (nitrogen availability), Snf1<sup>AMPK</sup> (carbon availability), ceramide (sphingolipids and fatty acid availability), and SAM (methionine availability). The two PP2A complexes integrate the metabolic input with the control of DDR. Irc21 acts upstream of PP2A: it shares the PP2A signature but also displays specific metabolic functions (Irc21 signature).

treatment in *mec1Δ irc21Δ sml1Δ* mutants and abolishes *irc21* rescue of Rad53 phosphorylation in *mec1Δ irc21Δ sml1Δ* cells during HU treatment.

The next key question is how Irc21 regulates PP2A activity. Among all metabolic alterations in *irc21* mutants, elevated ROS are potential contributors to PP2A suppression; ROS accumulation causes PP2A inactivation (Nakahata and Morishita, 2014). We excluded this hypothesis because ROS scavengers did not affect the capability of *irc21Δ* to rescue the HU sensitivity of checkpoint mutants (data not shown).

*IRC21* ablation alters sphingolipid metabolism and exhibits a reduction in DHC levels and an accumulation of DHC precursors

(3-keto-DHS, DHS, DHS-1-P, and VLCFA-CoA). Hence, *irc21Δ* mutants are deficient in ceramide biosynthesis, and the defective step corresponds to the DHS-DHC conversion. DHC is produced by the condensation of DHS with VLCFAs, catalyzed by ceramide synthases (Lag1, Lac1, Lip1). The reverse reaction, hydrolysis of ceramides into sphingosine and fatty acid, is catalyzed by Ydc1 and Ypc1 ceramidases. A synthesis defect or elevated ceramidase activity would cause accumulation of DHS and a reduction in DHC, as we can observe in the absence of Irc21 (Mao et al., 2000b). Accordingly, *irc21Δ* mutants are resistant to fumonisin B1, a ceramide synthase inhibitor (Wu et al., 1995). Hence, we favor the hypothesis that Irc21 promotes

the condensation reaction leading to the formation of DHC. One possibility is that *Irc21* facilitates the activity of the ceramide synthase; intriguingly, *LAC1* transcription is regulated by Rox1, a heme-dependent anaerobic repressor (Kolaczowski et al., 2004). Another possibility is that *Irc21* counteracts the activity of the *Ydc1* and *Ypc1* ceramidases that hydrolyze ceramides into sphingosine and fatty acid. Notably, *Ydc1* or *Ypc1* overexpression phenocopies the DHS accumulation and DHC reduction observed in *irc21* mutants (Mao et al., 2000a, 2000b). Interestingly, *Irc21* binds cardiolipin (CL), a mitochondrial phospholipid (Gallego et al., 2010) that is known to activate ceramidases (El Bawab et al., 2001).

Similar to *irc21Δ*, ablation of *SUR2* and *SCS7*, two other members of the cytochrome *b<sub>5</sub>*-dependent enzyme family involved in the hydroxylation of sphingolipid long-chain bases and ceramides (Haak et al., 1997), ameliorates the replication stress sensitivity of checkpoint mutants. Intriguingly, we identified *SCS7* as an epistatic interactor of *IRC21*. It is unlikely that this interaction reflects a role of *Irc21* in ceramide hydroxylation because a hydroxylation defect would likely not lead to diminished DHC levels. Together, these observations suggest that both ceramide synthesis and hydroxylation are required for efficient PP2A-mediated checkpoint control.

Ceramides activate PP2A in yeast and mammals (Nickels and Broach, 1996). Hence, *Irc21* might directly stimulate PP2A and attenuate the DDR by contributing to the production of ceramides. Interestingly, rapamycin and ceramide treatments cause a synergistic stimulation of PP2A activity, consistent with the view that TORC1 and *Irc21* regulate PP2A activity in a negative and positive way, respectively (Figure 7).

PP2A activity is stimulated by the SAM-Ppm1 axis (Laxman et al., 2014). The synthetic sickness between *ppm1* and *irc21* mutants may therefore result from the simultaneous ablation of two independent positive regulatory pathways leading to PP2A activation (Figure 7). In this scenario, the low PP2A activity observed in *ppm1* mutants would depend on the lack of PP2A methylation, whereas, in *irc21* mutants, it may result from limiting ceramide levels. Intriguingly, we show that *irc21* mutants display elevated SAM levels, raising the possibility that Ppm1-mediated PP2A methylation may facilitate basal PP2A activity in the absence of ceramide-dependent PP2A activation; consistently, *irc21* mutants are particularly sensitive to treatments that limit SAM availability.

We propose that the DDR is attenuated by PP2A/PP2A-like, which are negatively regulated by the TORC1-Tap42 axis and positively regulated by the *Irc21*-ceramide and SAM-Ppm1 pathways (Figure 7).

Nutrients not only supply energy and building blocks for cellular growth but also exert crucial regulatory functions. PP2A controls the phosphorylation status of several targets involved both in cell metabolism and the DDR. It integrates signals from nitrogen and carbon metabolism as a central TORC1 effector (Hughes Hallett et al., 2014; Ramachandran and Herman, 2011), methionine metabolism by a methylation event that is sensitive to the levels of *S*-adenosylmethionine (Sutter et al., 2013), and sphingolipid metabolism as ceramide-activated phosphatase (Janssens and Goris, 2001; Nickels and Broach, 1996). Here we show that nutritional pathways impinge on the

DDR by regulating PP2A, demonstrating a key role of PP2A in transducing metabolic signals to checkpoint kinases.

## STAR★METHODS

Detailed methods are provided in the online version of this paper and include the following:

- KEY RESOURCES TABLE
- CONTACT FOR REAGENTS AND RESOURCE SHARING
- EXPERIMENTAL MODEL AND SUBJECT DETAILS
  - Yeast Strains
- METHOD DETAILS
  - Media and drug sensitivity assay
  - Synthetic Genetic Array Screening
  - Tetrad dissection and random spore analysis
  - Western Blotting
  - Fluorescence-activated cell sorting (FACS) analysis
  - Budding index analysis
  - Measurement of intracellular ROS
  - Measurement of oxygen consumption
  - Search for suppressors of *mec1-100* sensitivity to HU
  - Metabolic analysis
  - TrueMass Ceramide Panel
- QUANTIFICATION AND STATISTICAL ANALYSIS
  - Interactome correlation analysis
  - Metabolome Analysis
  - Statistical tests
- DATA AND SOFTWARE AVAILABILITY

## SUPPLEMENTAL INFORMATION

Supplemental Information includes six figures and two tables and can be found with this article online at <http://dx.doi.org/10.1016/j.molcel.2017.05.027>.

## AUTHOR CONTRIBUTIONS

Conceptualization, E.F. and M.F.; Methodology, E.F. and M.F.; Formal Analysis, C.B. and W.V.C.; Investigation, E.F., M.P., C.C., S.M., and M.P.L.; Resources, E.F., C.B., M.E., G.S., C.L., R.B., and M.V.; Writing – Original Draft, E.F. and M.F.; Writing – Review & Editing, E.F., M.F., and C.B.; Visualization, E.F. and C.B.; Supervision, M.F.; Funding Acquisition, M.F.

## ACKNOWLEDGMENTS

We thank Jon Takemoto (Utah State University) for providing syringomycin; Marco Giorgio (IEO), Raluca Marcu (IEO), and Rachel Jossen (IFOM) for support during the experiments; and Sunil Laxman (INSTEM), Davide Cittaro (IFOM), Gianluca Deflorian (IFOM), and Lucilla Luzi (IEO) for helpful discussions. The work was supported by grants from the Associazione Italiana per la Ricerca sul Cancro (IG 16770 to M.F. and IG 15210 to M.P.L.), the European Union and Telethon-Italy (GGP12171 to M.F.), and Progetti di Ricerca di Interesse Nazionale (PRIN) 2015 (to M.F. and M.P.L.). C.C. was supported by a fellowship from the Fondazione Italiana per la Ricerca sul Cancro (18125). C.B. was supported by a fellowship by Associazione Italiana per la Ricerca sul Cancro (AIRC) Fellowship i-Care (Marie Curie co-funded by the European Union)—16173.

Received: October 27, 2016  
 Revised: April 11, 2017  
 Accepted: May 23, 2017  
 Published: June 22, 2017

## REFERENCES

- Abdullah, M.F., and Borts, R.H. (2001). Meiotic recombination frequencies are affected by nutritional states in *Saccharomyces cerevisiae*. *Proc. Natl. Acad. Sci. USA* **98**, 14524–14529.
- Alvaro, D., Lisby, M., and Rothstein, R. (2007). Genome-wide analysis of Rad52 foci reveals diverse mechanisms impacting recombination. *PLoS Genet.* **3**, e228.
- Awasthi, P., Foiani, M., and Kumar, A. (2016). ATM and ATR signaling at a glance. *J. Cell Sci.* **129**, 1285.
- Awaya, J., Ohno, T., Ohno, H., and Omura, S. (1975). Substitution of cellular fatty acids in yeast cells by the antibiotic cerulenin and exogenous fatty acids. *Biochim. Biophys. Acta* **409**, 267–273.
- Bartek, J., and Lukas, J. (2007). DNA damage checkpoints: from initiation to recovery or adaptation. *Curr. Opin. Cell Biol.* **19**, 238–245.
- Bashkurov, V.I., Bashkurova, E.V., Haghazari, E., and Heyer, W.D. (2003). Direct kinase-to-kinase signaling mediated by the FHA phosphoprotein recognition domain of the Dun1 DNA damage checkpoint kinase. *Mol. Cell. Biol.* **23**, 1441–1452.
- Bazzi, M., Mantiero, D., Trovesi, C., Lucchini, G., and Longhese, M.P. (2010). Dephosphorylation of gamma H2A by Glc7/protein phosphatase 1 promotes recovery from inhibition of DNA replication. *Mol. Cell. Biol.* **30**, 131–145.
- Bermejo, R., Capra, T., Jossen, R., Colosio, A., Frattini, C., Carotenuto, W., Cocito, A., Doksan, Y., Klein, H., Gómez-González, B., et al. (2011). The replication checkpoint protects fork stability by releasing transcribed genes from nuclear pores. *Cell* **146**, 233–246.
- Bernardi, P., and Azzone, G.F. (1981). Cytochrome c as an electron shuttle between the outer and inner mitochondrial membranes. *J. Biol. Chem.* **256**, 7187–7192.
- Chaudhri, V.K., Salzler, G.G., Dick, S.A., Buckman, M.S., Sordella, R., Karoly, E.D., Mohney, R., Stiles, B.M., Elemento, O., Altorki, N.K., and McGraw, T.E. (2013). Metabolic alterations in lung cancer-associated fibroblasts correlated with increased glycolytic metabolism of the tumor. *Mol. Cancer Res.* **11**, 579–592.
- Chen, L., Lai, Y., Zhu, X., Ma, L., Bai, Q., Vazquez, I., Xiao, Y., Liu, C., Li, D., Gao, C., et al. (2015). *Retraction.* *J. Cell Sci.* **128**, 421.
- Cochemé, H.M., and Murphy, M.P. (2009). Chapter 22. The uptake and interactions of the redox cyclers paraquat with mitochondria. *Methods Enzymol.* **456**, 395–417.
- Collins, S.R., Roguev, A., and Krogan, N.J. (2010). Quantitative genetic interaction mapping using the E-MAP approach. *Methods Enzymol.* **470**, 205–231.
- Costanzo, M., Baryshnikova, A., Bellay, J., Kim, Y., Spear, E.D., Sevier, C.S., Ding, H., Koh, J.L., Toufighi, K., Mostafavi, S., et al. (2010). The genetic landscape of a cell. *Science* **327**, 425–431.
- Davidson, J.F., Whyte, B., Bissinger, P.H., and Schiestl, R.H. (1996). Oxidative stress is involved in heat-induced cell death in *Saccharomyces cerevisiae*. *Proc. Natl. Acad. Sci. USA* **93**, 5116–5121.
- Desany, B.A., Alcasabas, A.A., Bachant, J.B., and Elledge, S.J. (1998). Recovery from DNA replicational stress is the essential function of the S-phase checkpoint pathway. *Genes Dev.* **12**, 2956–2970.
- Di Como, C.J., and Arndt, K.T. (1996). Nutrients, via the Tor proteins, stimulate the association of Tap42 with type 2A phosphatases. *Genes Dev.* **10**, 1904–1916.
- Dozier, C., Bonyadi, M., Baricault, L., Tonasso, L., and Darbon, J.M. (2004). Regulation of Chk2 phosphorylation by interaction with protein phosphatase 2A via its B' regulatory subunit. *Biol. Cell* **96**, 509–517.
- Düvel, K., Santhanam, A., Garrett, S., Schnepfer, L., and Broach, J.R. (2003). Multiple roles of Tap42 in mediating rapamycin-induced transcriptional changes in yeast. *Mol. Cell* **11**, 1467–1478.
- El Bawab, S., Birbes, H., Roddy, P., Szulc, Z.M., Bielawska, A., and Hannun, Y.A. (2001). Biochemical characterization of the reverse activity of rat brain ceramidase. A CoA-independent and fumonisins B1-insensitive ceramide synthase. *J. Biol. Chem.* **276**, 16758–16766.
- Fay, D.S., Sun, Z., and Stern, D.F. (1997). Mutations in SPK1/RAD53 that specifically abolish checkpoint but not growth-related functions. *Curr. Genet.* **31**, 97–105.
- Fiorani, S., Mimun, G., Caleca, L., Piccini, D., and Pellicoli, A. (2008). Characterization of the activation domain of the Rad53 checkpoint kinase. *Cell Cycle* **7**, 493–499.
- Freeman, A.K., and Monteiro, A.N. (2010). Phosphatases in the cellular response to DNA damage. *Cell Commun. Signal.* **8**, 27.
- Gallego, O., Betts, M.J., Gvozdenovic-Jeremic, J., Maeda, K., Matetzki, C., Aguilar-Gurrieri, C., Beltran-Alvarez, P., Bonn, S., Fernández-Torero, C., Jensen, L.J., et al. (2010). A systematic screen for protein-lipid interactions in *Saccharomyces cerevisiae*. *Mol. Syst. Biol.* **6**, 430.
- Girotti, A.W. (1998). Lipid hydroperoxide generation, turnover, and effector action in biological systems. *J. Lipid Res.* **39**, 1529–1542.
- Goodarzi, A.A., Jonnalagadda, J.C., Douglas, P., Young, D., Ye, R., Moorhead, G.B., Lees-Miller, S.P., and Khanna, K.K. (2004). Autophosphorylation of ataxia-telangiectasia mutated is regulated by protein phosphatase 2A. *EMBO J.* **23**, 4451–4461.
- Guan, K., Deschenes, R.J., and Dixon, J.E. (1992). Isolation and characterization of a second protein tyrosine phosphatase gene, PTP2, from *Saccharomyces cerevisiae*. *J. Biol. Chem.* **267**, 10024–10030.
- Guénolé, A., Srivas, R., Vreeken, K., Wang, Z.Z., Wang, S., Krogan, N.J., Ideker, T., and van Attikum, H. (2013). Dissection of DNA damage responses using multiconditional genetic interaction maps. *Mol. Cell* **49**, 346–358.
- Haak, D., Gable, K., Beeler, T., and Dunn, T. (1997). Hydroxylation of *Saccharomyces cerevisiae* ceramides requires Sur2p and Scs7p. *J. Biol. Chem.* **272**, 29704–29710.
- Harrison, J.C., and Haber, J.E. (2006). Surviving the breakup: the DNA damage checkpoint. *Annu. Rev. Genet.* **40**, 209–235.
- Hilton, B.A., Li, Z., Musich, P.R., Wang, H., Cartwright, B.M., Serrano, M., Zhou, X.Z., Lu, K.P., and Zou, Y. (2015). ATR plays a direct antiapoptotic role at mitochondria, which is regulated by prolyl isomerase Pin1. *Mol. Cell* **60**, 35–46.
- Huang, M., Zhou, Z., and Elledge, S.J. (1998). The DNA replication and damage checkpoint pathways induce transcription by inhibition of the Crt1 repressor. *Cell* **94**, 595–605.
- Huang, X., Liu, J., and Dickson, R.C. (2012). Down-regulating sphingolipid synthesis increases yeast lifespan. *PLoS Genet.* **8**, e1002493.
- Hughes Hallett, J.E., Luo, X., and Capaldi, A.P. (2014). State transitions in the TORC1 signaling pathway and information processing in *Saccharomyces cerevisiae*. *Genetics* **198**, 773–786.
- Huh, W.K., Falvo, J.V., Gerke, L.C., Carroll, A.S., Howson, R.W., Weissman, J.S., and O'Shea, E.K. (2003). Global analysis of protein localization in budding yeast. *Nature* **425**, 686–691.
- Hustedt, N., Seeber, A., Sack, R., Tsai-Pflugfelder, M., Bhullar, B., Vlaming, H., van Leeuwen, F., Guénolé, A., van Attikum, H., Srivas, R., et al. (2015). Yeast PP4 interacts with ATR homolog Ddc2-Mec1 and regulates checkpoint signaling. *Mol. Cell* **57**, 273–289.
- Ira, G., Pellicoli, A., Balija, A., Wang, X., Fiorani, S., Carotenuto, W., Liberi, G., Bressan, D., Wan, L., Hollingsworth, N.M., et al. (2004). DNA end resection, homologous recombination and DNA damage checkpoint activation require CDK1. *Nature* **431**, 1011–1017.
- Janssens, V., and Goris, J. (2001). Protein phosphatase 2A: a highly regulated family of serine/threonine phosphatases implicated in cell growth and signaling. *Biochem. J.* **353**, 417–439.
- Jiang, Y. (2006). Regulation of the cell cycle by protein phosphatase 2A in *Saccharomyces cerevisiae*. *Microbiol. Mol. Biol. Rev.* **70**, 440–449.
- Keogh, M.C., Kim, J.A., Downey, M., Fillingham, J., Chowdhury, D., Harrison, J.C., Onishi, M., Datta, N., Galicia, S., Emili, A., et al. (2006). A phosphatase complex that dephosphorylates gammaH2AX regulates DNA damage checkpoint recovery. *Nature* **439**, 497–501.

- Koh, J.L., Chong, Y.T., Friesen, H., Moses, A., Boone, C., Andrews, B.J., and Moffat, J. (2015). CYCLOPs: a comprehensive database constructed from automated analysis of protein abundance and subcellular localization patterns in *Saccharomyces cerevisiae*. *G3 (Bethesda)* 5, 1223–1232.
- Kolaczowski, M., Kolaczowska, A., Gaigg, B., Schneider, R., and Moye-Rowley, W.S. (2004). Differential regulation of ceramide synthase components LAC1 and LAG1 in *Saccharomyces cerevisiae*. *Eukaryot. Cell* 3, 880–892.
- Kolde, R. (2015). pheatmap: Pretty Heatmaps. R Package Version 1.0.8. <https://CRAN.R-project.org/package=pheatmap>.
- Kontoyiannis, D.P. (2000). Modulation of fluconazole sensitivity by the interaction of mitochondria and erg3p in *Saccharomyces cerevisiae*. *J. Antimicrob. Chemother.* 46, 191–197.
- Kumar, A., Mazzanti, M., Mistrik, M., Kosar, M., Beznoussenko, G.V., Mironov, A.A., Garrè, M., Parazzoli, D., Shivashankar, G.V., Scita, G., et al. (2014). ATR mediates a checkpoint at the nuclear envelope in response to mechanical stress. *Cell* 158, 633–646.
- Lamb, D.C., Kelly, D.E., Manning, N.J., Kaderbhai, M.A., and Kelly, S.L. (1999). Biodiversity of the P450 catalytic cycle: yeast cytochrome b5/NADH cytochrome b5 reductase complex efficiently drives the entire sterol 14-demethylation (CYP51) reaction. *FEBS Lett.* 462, 283–288.
- Laxman, S., Sutter, B.M., Shi, L., and Tu, B.P. (2014). Npr2 inhibits TORC1 to prevent inappropriate utilization of glutamine for biosynthesis of nitrogen-containing metabolites. *Sci. Signal.* 7, ra120.
- Lee, K.S., Hines, L.K., and Levin, D.E. (1993). A pair of functionally redundant yeast genes (PPZ1 and PPZ2) encoding type 1-related protein phosphatases function within the PKC1-mediated pathway. *Mol. Cell. Biol.* 13, 5843–5853.
- Lee, S.J., Schwartz, M.F., Duong, J.K., and Stern, D.F. (2003). Rad53 phosphorylation site clusters are important for Rad53 regulation and signaling. *Mol. Cell. Biol.* 23, 6300–6314.
- Lee, W., St Onge, R.P., Proctor, M., Flaherty, P., Jordan, M.I., Arkin, A.P., Davis, R.W., Nislow, C., and Giaever, G. (2005). Genome-wide requirements for resistance to functionally distinct DNA-damaging agents. *PLoS Genet.* 1, e24.
- Leroy, C., Lee, S.E., Vaze, M.B., Ochsenbein, F., Guerois, R., Haber, J.E., and Marsolier-Kergoat, M.C. (2003). PP2C phosphatases Ptc2 and Ptc3 are required for DNA checkpoint inactivation after a double-strand break. *Mol. Cell* 11, 827–835.
- Loewith, R., and Hall, M.N. (2011). Target of rapamycin (TOR) in nutrient signaling and growth control. *Genetics* 189, 1177–1201.
- Loewith, R., Jacinto, E., Wullschlegel, S., Lorberg, A., Crespo, J.L., Bonenfant, D., Oppliger, W., Jenoe, P., and Hall, M.N. (2002). Two TOR complexes, only one of which is rapamycin sensitive, have distinct roles in cell growth control. *Mol. Cell* 10, 457–468.
- Luke, M.M., Della Seta, F., Di Como, C.J., Sugimoto, H., Kobayashi, R., and Arndt, K.T. (1996). The SAP, a new family of proteins, associate and function positively with the SIT4 phosphatase. *Mol. Cell. Biol.* 16, 2744–2755.
- Mao, C., Xu, R., Bielawska, A., and Obeid, L.M. (2000a). Cloning of an alkaline ceramidase from *Saccharomyces cerevisiae*. An enzyme with reverse (CoA-independent) ceramide synthase activity. *J. Biol. Chem.* 275, 6876–6884.
- Mao, C., Xu, R., Bielawska, A., Szulc, Z.M., and Obeid, L.M. (2000b). Cloning and characterization of a *Saccharomyces cerevisiae* alkaline ceramidase with specificity for dihydroceramide. *J. Biol. Chem.* 275, 31369–31378.
- Matsuoka, S., Ballif, B.A., Smogorzewska, A., McDonald, E.R., 3rd, Hurov, K.E., Luo, J., Bakalarski, C.E., Zhao, Z., Solimini, N., Lerenthal, Y., et al. (2007). ATM and ATR substrate analysis reveals extensive protein networks responsive to DNA damage. *Science* 316, 1160–1166.
- Mitchell, A.G., and Martin, C.E. (1997). Fah1p, a *Saccharomyces cerevisiae* cytochrome b5 fusion protein, and its *Arabidopsis thaliana* homolog that lacks the cytochrome b5 domain both function in the alpha-hydroxylation of sphingolipid-associated very long chain fatty acids. *J. Biol. Chem.* 272, 28281–28288.
- Nakahata, S., and Morishita, K. (2014). PP2A inactivation by ROS accumulation. *Blood* 124, 2163–2165.
- Neklesa, T.K., and Davis, R.W. (2008). Superoxide anions regulate TORC1 and its ability to bind Fpr1:rapamycin complex. *Proc. Natl. Acad. Sci. USA* 105, 15166–15171.
- Nickels, J.T., and Broach, J.R. (1996). A ceramide-activated protein phosphatase mediates ceramide-induced G1 arrest of *Saccharomyces cerevisiae*. *Genes Dev.* 10, 382–394.
- O'Neill, B.M., Szyjka, S.J., Lis, E.T., Bailey, A.O., Yates, J.R., 3rd, Aparicio, O.M., and Romesberg, F.E. (2007). Pph3-Psy2 is a phosphatase complex required for Rad53 dephosphorylation and replication fork restart during recovery from DNA damage. *Proc. Natl. Acad. Sci. USA* 104, 9290–9295.
- Oh, C.S., Toke, D.A., Mandala, S., and Martin, C.E. (1997). ELO2 and ELO3, homologues of the *Saccharomyces cerevisiae* ELO1 gene, function in fatty acid elongation and are required for sphingolipid formation. *J. Biol. Chem.* 272, 17376–17384.
- Paciotti, V., Clerici, M., Scotti, M., Lucchini, G., and Longhese, M.P. (2001). Characterization of mec1 kinase-deficient mutants and of new hypomorphic mec1 alleles impairing subsets of the DNA damage response pathway. *Mol. Cell. Biol.* 21, 3913–3925.
- Pelliccioli, A., Lucca, C., Liberi, G., Marini, F., Lopes, M., Plevani, P., Romano, A., Di Fiore, P.P., and Foiani, M. (1999). Activation of Rad53 kinase in response to DNA damage and its effect in modulating phosphorylation of the lagging strand DNA polymerase. *EMBO J.* 18, 6561–6572.
- Petryni, G., Ryder, N.S., and Stütz, A. (1984). Allylamine derivatives: new class of synthetic antifungal agents inhibiting fungal squalene epoxidase. *Science* 224, 1239–1241.
- Qiu, J., Qian, Y., Frank, P., Wintersberger, U., and Shen, B. (1999). *Saccharomyces cerevisiae* RNase H(35) functions in RNA primer removal during lagging-strand DNA synthesis, most efficiently in cooperation with Rad27 nuclease. *Mol. Cell. Biol.* 19, 8361–8371.
- Ramachandran, V., and Herman, P.K. (2011). Antagonistic interactions between the cAMP-dependent protein kinase and Tor signaling pathways modulate cell growth in *Saccharomyces cerevisiae*. *Genetics* 187, 441–454.
- Rand, J.D., and Grant, C.M. (2006). The thioredoxin system protects ribosomes against stress-induced aggregation. *Mol. Biol. Cell* 17, 387–401.
- Rempola, B., Kaniak, A., Migdalski, A., Rytka, J., Slonimski, P.P., and di Rago, J.P. (2000). Functional analysis of RRD1 (YIL153w) and RRD2 (YPL152w), which encode two putative activators of the phosphotyrosyl phosphatase activity of PP2A in *Saccharomyces cerevisiae*. *Mol. Gen. Genet.* 262, 1081–1092.
- Rossi, S.E., Ajazi, A., Carotenuto, W., Foiani, M., and Giannattasio, M. (2015). Rad53-mediated regulation of Rrm3 and Pif1 DNA helicases contributes to prevention of aberrant fork transitions under replication stress. *Cell Rep.* 13, 80–92.
- RStudio Team. (2016). RStudio: Integrated Development for RStudio. <http://www.rstudio.com/>.
- Saeed, A.I., Sharov, V., White, J., Li, J., Liang, W., Bhagabati, N., Braisted, J., Klapa, M., Currier, T., Thiagarajan, M., et al. (2003). TM4: a free, open-source system for microarray data management and analysis. *Biotechniques* 34, 374–378.
- Sanchez, Y., Desany, B.A., Jones, W.J., Liu, Q., Wang, B., and Elledge, S.J. (1996). Regulation of RAD53 by the ATM-like kinases MEC1 and TEL1 in yeast cell cycle checkpoint pathways. *Science* 271, 357–360.
- Slater, M.L. (1973). Effect of reversible inhibition of deoxyribonucleic acid synthesis on the yeast cell cycle. *J. Bacteriol.* 113, 263–270.
- Smyth, G.K. (2004). Linear models and empirical bayes methods for assessing differential expression in microarray experiments. *Stat. Appl. Genet. Mol. Biol.* 3, Article3.
- Sogo, J.M., Lopes, M., and Foiani, M. (2002). Fork reversal and ssDNA accumulation at stalled replication forks owing to checkpoint defects. *Science* 297, 599–602.
- Staschke, K.A., Dey, S., Zaborske, J.M., Palam, L.R., McClintick, J.N., Pan, T., Edenberg, H.J., and Wek, R.C. (2010). Integration of general amino acid control and target of rapamycin (TOR) regulatory pathways in nitrogen assimilation in yeast. *J. Biol. Chem.* 285, 16893–16911.



- Stock, S.D., Hama, H., Radding, J.A., Young, D.A., and Takemoto, J.Y. (2000). Syringomycin E inhibition of *Saccharomyces cerevisiae*: requirement for biosynthesis of sphingolipids with very-long-chain fatty acids and mannose- and phosphoinositol-containing head groups. *Antimicrob. Agents Chemother.* *44*, 1174–1180.
- Sun, Z., Fay, D.S., Marini, F., Foiani, M., and Stern, D.F. (1996). Spk1/Rad53 is regulated by Mec1-dependent protein phosphorylation in DNA replication and damage checkpoint pathways. *Genes Dev.* *10*, 395–406.
- Sutter, B.M., Wu, X., Laxman, S., and Tu, B.P. (2013). Methionine inhibits autophagy and promotes growth by inducing the SAM-responsive methylation of PP2A. *Cell* *154*, 403–415.
- Takemoto, J.Y., Yu, Y., Stock, S.D., and Miyakawa, T. (1993). Yeast genes involved in growth inhibition by *Pseudomonas syringae* pv. *syringae* syringomycin family lipodepsipeptides. *FEMS Microbiol. Lett.* *114*, 339–342.
- Thomas, B.J., and Rothstein, R. (1989). Elevated recombination rates in transcriptionally active DNA. *Cell* *56*, 619–630.
- Tong, A.H., and Boone, C. (2006). Synthetic genetic array analysis in *Saccharomyces cerevisiae*. *Methods Mol. Biol.* *313*, 171–192.
- Tong, A.H., Evangelista, M., Parsons, A.B., Xu, H., Bader, G.D., Pagé, N., Robinson, M., Raghibizadeh, S., Hogue, C.W., Bussey, H., et al. (2001). Systematic genetic analysis with ordered arrays of yeast deletion mutants. *Science* *294*, 2364–2368.
- Tong, A.H., Lesage, G., Bader, G.D., Ding, H., Xu, H., Xin, X., Young, J., Berriz, G.F., Brost, R.L., Chang, M., et al. (2004). Global mapping of the yeast genetic interaction network. *Science* *303*, 808–813.
- Torres, J.Z., Schnakenberg, S.L., and Zakian, V.A. (2004). *Saccharomyces cerevisiae* Rrm3p DNA helicase promotes genome integrity by preventing replication fork stalling: viability of *rrm3* cells requires the intra-S-phase checkpoint and fork restart activities. *Mol. Cell Biol.* *24*, 3198–3212.
- Urban, J., Soulard, A., Huber, A., Lippman, S., Mukhopadhyay, D., Deloche, O., Wanke, V., Anrather, D., Ammerer, G., Riezman, H., et al. (2007). Sch9 is a major target of TORC1 in *Saccharomyces cerevisiae*. *Mol. Cell* *26*, 663–674.
- Usui, T., Ogawa, H., and Petrini, J.H. (2001). A DNA damage response pathway controlled by Tel1 and the Mre11 complex. *Mol. Cell* *7*, 1255–1266.
- Van Hoof, C., Martens, E., Longin, S., Jordens, J., Stevens, I., Janssens, V., and Goris, J. (2005). Specific interactions of PP2A and PP2A-like phosphatases with the yeast PTPA homologues, Ypa1 and Ypa2. *Biochem. J.* *386*, 93–102.
- Vergères, G., and Waskell, L. (1995). Cytochrome b5, its functions, structure and membrane topology. *Biochimie* *77*, 604–620.
- Wu, W.I., McDonough, V.M., Nickels, J.T., Jr., Ko, J., Fischl, A.S., Vales, T.R., Merrill, A.H., Jr., and Carman, G.M. (1995). Regulation of lipid biosynthesis in *Saccharomyces cerevisiae* by fumonisin B1. *J. Biol. Chem.* *270*, 13171–13178.
- Zhang, Z., Zhao, S., Long, F., Zhang, L., Bai, G., Shima, H., Nagao, M., and Lee, E.Y. (1994). A mutant of protein phosphatase-1 that exhibits altered toxin sensitivity. *J. Biol. Chem.* *269*, 16997–17000.
- Zhao, X., Muller, E.G., and Rothstein, R. (1998). A suppressor of two essential checkpoint genes identifies a novel protein that negatively affects dNTP pools. *Mol. Cell* *2*, 329–340.

## STAR★METHODS

## KEY RESOURCES TABLE

| REAGENT or RESOURCE                                                                                                                                           | SOURCE                          | IDENTIFIER                                                                                    |
|---------------------------------------------------------------------------------------------------------------------------------------------------------------|---------------------------------|-----------------------------------------------------------------------------------------------|
| <b>Antibodies</b>                                                                                                                                             |                                 |                                                                                               |
| Mouse monoclonal anti Rad53 (clone EL7) (Dilution for western blot 1:5)                                                                                       | In house (Fiorani et al., 2008) | N/A                                                                                           |
| Rabbit polyclonal anti Mre11 (clone 263) (Dilution for western blot 1:15000)                                                                                  | In house (Ira et al., 2004)     | N/A                                                                                           |
| Rabbit polyclonal anti Histone H2A phospho S129 (Dilution for western blot 1:500)                                                                             | Abcam                           | Cat# ab15083; RRID: AB_301630                                                                 |
| Rabbit polyclonal anti Histone H2A (Dilution for western blot 1:3500)                                                                                         | Active Motif                    | Cat# 39235                                                                                    |
| Mouse monoclonal anti c-MYC (clone 9E10) (Dilution for western blot 1:2000)                                                                                   | Santa Cruz Biotechnology        | Cat# sc-40, RRID: AB_627268                                                                   |
| Mouse monoclonal anti-Viral V5-TAG (Clone SV5-Pk1) (Dilution for western blot 1:30000)                                                                        | Bio-Rad                         | Cat# MCA1360G, RRID: AB_1172162                                                               |
| Goat Anti-Mouse IgG (H + L)-HRP Conjugate (Dilution for western blot 1:15000)                                                                                 | Bio-Rad                         | Cat# 1706516                                                                                  |
| Goat Anti-Rabbit IgG (H + L)-HRP Conjugate (Dilution for western blot 1:15000)                                                                                | Bio-Rad                         | Cat# 1706515                                                                                  |
| <b>Chemicals, Peptides, and Recombinant Proteins</b>                                                                                                          |                                 |                                                                                               |
| Hydroxyurea                                                                                                                                                   | Sigma                           | Cat# H8627                                                                                    |
| Rapamycin                                                                                                                                                     | Sigma                           | Cat# R0395                                                                                    |
| Metformin                                                                                                                                                     | Sigma                           | Cat# D150959                                                                                  |
| Caffeine                                                                                                                                                      | Sigma                           | Cat# C8960                                                                                    |
| Wortmannin                                                                                                                                                    | Sigma                           | Cat# W1628                                                                                    |
| Okadaic acid                                                                                                                                                  | LC laboratories                 | Cat# O-2220                                                                                   |
| C <sub>2</sub> ceramide                                                                                                                                       | Sigma                           | Cat# A7191                                                                                    |
| Dihydroceramide C <sub>2</sub>                                                                                                                                | Sigma                           | Cat# C7980                                                                                    |
| Myriocin                                                                                                                                                      | Sigma                           | Cat# M1177                                                                                    |
| Paraquat dichloride hydrate                                                                                                                                   | Sigma                           | Cat# 36541                                                                                    |
| Mersalyl                                                                                                                                                      | Sigma                           | Cat# M9784                                                                                    |
| Tert-butyl hydroperoxide                                                                                                                                      | Aldrich                         | Cat# 416665                                                                                   |
| Terbinafine hydrochloride                                                                                                                                     | Sigma                           | Cat# T8826                                                                                    |
| Fluonazole                                                                                                                                                    | Sigma                           | Cat# F8929                                                                                    |
| Cerulenin                                                                                                                                                     | Sigma                           | Cat# C2389                                                                                    |
| Syngomycin E                                                                                                                                                  | Laboratory of Jon Takemoto      | N/A                                                                                           |
| Fumonisin B1                                                                                                                                                  | Enzo                            | Cat# BML-SL220                                                                                |
| L-Ethionine                                                                                                                                                   | Sigma                           | Cat# E1260                                                                                    |
| Cycloleucine                                                                                                                                                  | Aldrich                         | Cat# A48105                                                                                   |
| <b>Deposited Data</b>                                                                                                                                         |                                 |                                                                                               |
| Raw data: Metabolomics                                                                                                                                        | This study; Mendeley data       | <a href="http://dx.doi.org/10.17632/jfhwwhczx8.1">http://dx.doi.org/10.17632/jfhwwhczx8.1</a> |
| Raw data: Synthetic Genetic Array (SGA)                                                                                                                       | This study; Mendeley data       | <a href="http://dx.doi.org/10.17632/jfhwwhczx8.1">http://dx.doi.org/10.17632/jfhwwhczx8.1</a> |
| <b>Experimental Models: Organisms/Strains</b>                                                                                                                 |                                 |                                                                                               |
| All <i>Saccharomyces cerevisiae</i> yeast strains used in this study were W303 derivatives with the wild type <i>RAD5</i> locus. They are listed in Table S1. | This study                      | N/A                                                                                           |
| <i>MATa</i> deletion mutant array (S288C)                                                                                                                     | OpenBiosystems                  | Cat#: YSC1053                                                                                 |
| <i>MATα</i> query strain (S288C). See Table S1.                                                                                                               | Laboratory of Charles Boone     | N/A                                                                                           |

(Continued on next page)

| <b>Continued</b>                                                                |                                      |                                                                                                                       |
|---------------------------------------------------------------------------------|--------------------------------------|-----------------------------------------------------------------------------------------------------------------------|
| REAGENT or RESOURCE                                                             | SOURCE                               | IDENTIFIER                                                                                                            |
| Oligonucleotides                                                                |                                      |                                                                                                                       |
| See <a href="#">Table S2</a> for a list of oligonucleotides used in this study. | This study                           | N/A                                                                                                                   |
| Software and Algorithms                                                         |                                      |                                                                                                                       |
| MultiExperimentViewer 4.9.0 (MeV)                                               | <a href="#">Saeed et al., 2003</a>   | <a href="https://sourceforge.net/projects/mev-tm4/">https://sourceforge.net/projects/mev-tm4/</a>                     |
| LIMMA (MeV module)                                                              | <a href="#">Smyth, 2004</a>          | <a href="https://sourceforge.net/projects/mev-tm4/">https://sourceforge.net/projects/mev-tm4/</a>                     |
| RStudio 1.0.136                                                                 | <a href="#">RStudio Team, 2016</a>   | <a href="https://www.rstudio.com/products/rstudio/download2/">https://www.rstudio.com/products/rstudio/download2/</a> |
| pheatmap 1.0.8 (R package)                                                      | <a href="#">Kolde, 2015</a>          | <a href="https://CRAN.R-project.org/package=pheatmap">https://CRAN.R-project.org/package=pheatmap</a>                 |
| HT Colony Grid Analyzer 1.1.7                                                   | <a href="#">Collins et al., 2010</a> | <a href="https://sourceforge.net/projects/ht-col-measurer/">https://sourceforge.net/projects/ht-col-measurer/</a>     |

## CONTACT FOR REAGENTS AND RESOURCE SHARING

Further information and requests for resources and reagents should be directed to and will be fulfilled by the Lead Contact, Marco Foiani ([marco.foiani@ifom.eu](mailto:marco.foiani@ifom.eu)).

## EXPERIMENTAL MODEL AND SUBJECT DETAILS

### Yeast Strains

All yeast strains used in this study are listed in the [Key Resources Table](#). All strains and genetic manipulations were verified by polymerase chain reaction (PCR) and phenotype. Gene deletions were carried out using either tetrad dissection or standard PCR-based strategies to amplify resistance cassettes with appropriate flanking sequences, and replacing the target gene by homologous recombination. Carboxy-terminal tags were similarly made with the PCR-based method to amplify resistance cassettes with flanking sequences. Primer sequences for gene deletions/carboxy-terminal tags and disruption/alteration controls are listed in the [Key Resources Table](#) or available upon request, respectively.

## METHOD DETAILS

### Media and drug sensitivity assay

Unless otherwise stated, yeast strains were grown in yeast extract/peptone with 2% glucose (YPD). YPD agar plates were supplemented with adenine. Cells were synchronized in G1 with  $\alpha$ -factor to a final concentration of 3  $\mu$ g/ml. For drug sensitivity assay, cells were grown overnight. Serial 1:5 dilutions of stationary cultures were made and one drop of each dilution was pin-spotted onto agar plates, containing drugs. Plates were incubated for 2-3 days at 28°C.

For liquid drug sensitivity assay, yeast strains were grown in SD liquid medium at the initial concentration of 10<sup>5</sup> cell/ml in microtiter wells. Cultures were either left untreated (control-solvent) or were treated with the drug of interest. The absorbance (OD<sub>595</sub>) of untreated and treated cultures was measured after 12-18 hr. 3 independent repeats were performed. For ceramide experiments, we noticed a rapid response (few minutes for PP2A activity, within one hour for DDR activity).

### Synthetic Genetic Array Screening

Synthetic genetic array (SGA) was carried out as described ([Tong et al., 2001, 2004](#)). Shortly, congenic *irc21Δ* (6 replicates) and wt (4 replicates) query strains were crossed with the haploid viable library ([Tong et al., 2001](#)). Colony sizes were quantified with the Colony Grid Analyzer (version 1.1.7) ([Collins et al., 2010](#)), and normalized to the intra-dish 80-percentile. A 1 x standard error separation of normalized wt and *irc21Δ* colony sizes was used to call candidate hits for negative interactions. A 10% increase of *irc21Δ* colony sizes in relation to the *irc21Δ* 80-percentile and the respective normalized wt colony size, and a 1 x standard error separation from the *irc21Δ* 80-percentile were used to call candidates for rescue interactions.

### Tetrad dissection and random spore analysis

Standard procedures were used for tetrad dissection and random spore analysis ([Abdullah and Borts, 2001; Tong and Boone, 2006](#)). Mata and Mat $\alpha$  cells were mixed on rich medium and allowed to mate at 28°C. Sporulation was induced at 23°C by transfer to VB sporulation medium. Ascal walls were removed by digestion with zymolase at 37°C. The four spores of each tetrad were separated

from each other, germinated on YPD, and allowed to grow before scoring for genetic markers. For random spore analysis, a small amount of spores was inoculated in water and plated on marker selection plates.

### Western Blotting

Protein extracts for western blotting were prepared following cell fixation using trichloroacetic acid and analyzed by SDS-polyacrylamide gel electrophoresis. Briefly, cells were quickly spun down and the pellet was resuspended in 20% TCA and lysed by bead beating. Lysate and precipitate/debris was mixed with 200  $\mu$ L 5% TCA and pelleted. The pellet was resuspended in 100  $\mu$ L Laemli buffer 1X ( $\beta$ -mercaptoethanol as reducing agent) and 100  $\mu$ L Tris base 1M, boiled for 5 min. After centrifugation, the supernatant was transferred in new tubes.

Antibodies used for detection are listed in the [Key Resources Table](#). Detection was done through electrogenerated chemiluminescence (ECL, GE- Healthcare).

### Fluorescence-activated cell sorting (FACS) analysis

Cell cycle analysis was conducted as previously described ([Pelliccioli et al., 1999](#)).

Cells were spun down and the pellet was resuspended in 250mM Tris-HCl pH 7.5, 70% ethanol and kept on ice for at least 30 min. The pellet was resuspended in 50mM Tris-HCl pH 7.5 and RNase A 1mg/ml and incubated at 37°C. The pellet was resuspended in 200mM TRIS-HCl pH 7.5, 200mM NaCl, 78mM MgCl<sub>2</sub>, Propidium Iodide. Before cytofluorimetric analysis, cells were diluted in Tris-HCl pH 7.5 in tubes and sonicated.

### Budding index analysis

After sonication, cells were fixed by the addition of 3.7% formaldehyde and 0.9% NaCl. Cells were examined under a light microscope, by counting 200 cells per time point.

### Measurement of intracellular ROS

ROS measurement was conducted as previously described ([Rand and Grant, 2006](#)). Shortly, exponentially growing cells were harvested and resuspended in PBS containing the oxidant-sensitive probe 2',7'-dichlorofluorescein diacetate (DCFH-DA). Cells were broken with glass beads and fluorescence was measured with excitation and emission wavelengths of 485 and 528 nm, respectively.

### Measurement of oxygen consumption

Respiration of log-phase *S. cerevisiae* cells was measured by polarographic analysis using a Clark's type oxygen electrode (Hansatech Instrument Ltd, Pentney UK) according to standard procedures, upon addition of dinitrophenol as uncoupling agent of respiration/ATP synthesis.

### Search for suppressors of *mec1-100* sensitivity to HU

To search for suppressor mutations of the HU-sensitivity of *mec1-100* mutant,  $1 \times 10^6$  *mec1-100* cells were plated on YEPD in the presence of 25mM HU. Survivors were crossed to wt cells to identify by tetrad analysis that the suppression events were due to single-gene mutations. Subsequent genetic analyses allowed grouping the single-gene suppression events in 4 classes. The class that showed the most efficient suppression was chosen and the mutations altering open reading frames within the reference *S. cerevisiae* genome were identified by next-generation Illumina sequencing (IGA technology services). To confirm that the *tap42-G360R* mutation was responsible for the suppression, a *URA3* gene was integrated downstream of the *tap42-G360R* stop codon and the resulting strain was crossed to wt cells to verify by tetrad dissection that the suppression of the *mec1-100* HU sensitivity co-segregated with the *URA3* allele.

### Metabolic analysis

Yeast cells were grown to logarithmic phase ( $1 \times 10^7$  cells/mL) in YPD medium in 6 replicates.  $5 \times 10^8$  cells per replicate were harvested by centrifugation, washed in water, snap-frozen in liquid nitrogen and stored at  $-80^\circ\text{C}$ . Metabolite extraction and Ultrahigh Performance Liquid Chromatography-Tandem Mass Spectroscopy analysis of 484 metabolites were performed by Metabolon (Durham, North Carolina) as previously described ([Chaudhri et al., 2013](#)). Missing metabolite raw intensity values were filled in with the lowest detectable intensity of the respective metabolite, and all raw intensities were normalized to the median intensity of the respective replicate. Fold changes and significant alterations were calculated with the LIMMA method implemented in MultiExperiment Viewer (MeV) software (version 4.9.0) ([Saeed et al., 2003](#); [Smyth, 2004](#)) using an adjusted *p* value of 0.05 and a minimum fold-change of 1.3.

### TrueMass Ceramide Panel

Metabolites were isolated from cell pellets by sequential chloroform/methanol extraction and aqueous potassium chloride liquid-liquid extraction. The chloroform/methanol solution contained internal standards (Cer12:0, Cer19:0, dhCer12:0, hexCer12:0, [Avanti Polar Lipids, Alabaster, AL]) The organic layer was evaporated in a stream of nitrogen, reconstituted and subjected to a solid phase extraction clean up step on silica [Si, 100 mg, Supelco, Bellefonte, PA]. The ceramide fraction was eluted, evaporated in a stream of nitrogen, reconstituted and an aliquot was injected onto an AB Sciex 4000 QTRAP (Sciex, Foster City, CA)/Acquity (Waters, Milford,

MA) LC-MS/MS system equipped with a reversed phase UHPLC column [Zorbax Eclipse Plus C8, 2.1 × 150 mm, 1.8 μm, Agilent Technologies] using a gradient of 2mM ammonium formate/0.2% formic acid in water and 1 mM ammonium formate/0.2% formic acid in Acetonitrile:Isopropanol (60:40). The mass spectrometer was operated in MRM mode using positive electrospray ionization.

The peak areas of the analyte fragment ions were measured against the peak area of the respective fragment ions of the corresponding internal standards. For the purposes of this panel, the fragment ion m/z 264 was used for ceramides with a sphingosine backbone and the m/z 266 fragment was used for analytes with a sphinganine backbone. Quantitation was based on a series of five calibration standard samples that were included in each run. Calibration standards contained 26 reference compounds. For analytes for which calibration standards were not commercially available, a surrogate analyte from the same compound class was used for quantitation (e.g., quantitation of CER 22:1 is based on CER 20:0 calibration standards). A total of 56 analytes covering ceramides, dihydroceramides, hexosylceramides and lactosylceramides with different fatty acid composition (14:0, 16:0, 18:0, 18:1, 20:0, 20:1, 22:0, 22:1, 24:0, 24:1, 26:0, 26:1) were determined.

## QUANTIFICATION AND STATISTICAL ANALYSIS

### Interactome correlation analysis

Interactome correlation analysis of *irc21Δ* was performed with published genome-wide SGA scores (Costanzo et al., 2010). The genetic interaction scores between 3884 array and 1712 query strains were used to calculate correlation coefficients (R) of the query strain *irc21Δ* with all other query strains, using the CORREL function in Microsoft Excel 2013 (Figure 3A). The pairwise correlation coefficients (R) between PP2A subunits were calculated accordingly (Figure 3B). Genetic interactions underlying the interactome similarity between *irc21Δ*, *rrd1Δ* and *tip41Δ* were derived from the intermediate cutoff interactor table in (Costanzo et al., 2010; Figure 3C). Interactors were included if either *rrd1Δ* or *tip41Δ* showed the same interaction type as *irc21Δ*. Unsupervised hierarchical clustering and heatmap representation of correlation coefficients and genetic interaction scores were done in MeV.

### Metabolome Analysis

Unsupervised hierarchical clustering of metabolome samples by Pearson correlation coefficient and heatmap representation were performed in R using the pheatmap library (version 1.0.8). Significance analysis was performed with LIMMA implemented in MeV as described above. Significances of the intersections of metabolite alterations were calculated by chi-square test. Heatmaps for visualization of altered metabolite classes were generated with MeV.

### Statistical tests

The statistical significance was assessed using the indicated assays. Student's t test was used for pairwise comparisons. ANOVA was used for comparisons of multiple groups. Number of replicates (n) and p values are specified in corresponding Figure legends.

## DATA AND SOFTWARE AVAILABILITY

Raw data have been deposited to Mendeley Data and are available at <http://dx.doi.org/10.17632/jfhwwhczx8.1>.

**Molecular Cell, Volume 67**

**Supplemental Information**

**PP2A Controls Genome Integrity by Integrating  
Nutrient-Sensing and Metabolic Pathways  
with the DNA Damage Response**

**Elisa Ferrari, Christopher Bruhn, Marta Peretti, Corinne Cassani, Walter Vincenzo Carotenuto, Mohamed Elgendy, Ghadeer Shubassi, Chiara Lucca, Rodrigo Bermejo, Mario Varasi, Saverio Minucci, Maria Pia Longhese, and Marco Foiani**

## INVENTORY OF SUPPLEMENTARY INFORMATION

### Supplemental Figures

**Figure S1, Related to Figure 1.** *IRC21* deletion rescues checkpoint mutants.

**Figure S2, Related to Figure 3.** *Irc21* interacts with PP2A and PP2A-like phosphatases.

**Figure S3, Related to Figure 3.** *Irc21* interacts with PP2A and PP2A-like phosphatases.

**Figure S4, Related to Figure 4.** PP2A mutants rescue checkpoint defects.

**Figure S5, Related to Figure 5.** *Irc21* exerts PP2A-dependent and PP2A-activating metabolic regulations.

**Figure S6, Related to Figure 6.** Ceramides, TORC1 and Ppm1 impact on the HU-induced DDR by modulating PP2A activity.

### Supplemental Tables

**Table S1,** Yeast strains used in this study, related to STAR Methods.

See excel File Table S1.

**Table S2,** Primer sequences used in this study, related to STAR Methods.

See excel File Table S2.

**Figure S1, Related to Figure 1. *IRC21* deletion rescue checkpoint mutants.**

(A,B,D) Cells were grown on YPD plates +/- HU (Figure S1D: a superfluous part of the plates was digitally eliminated).

(C) Cells were arrested in G<sub>1</sub> with  $\alpha$ -factor ( $\alpha$ F) and released into YPD containing 0.2 M HU. After 3 hours, cells were released into YPD. Samples were collected at

the indicated times to determine DNA content by fluorescence-activated cell sorting (FACS) analysis (Related to Figure 1D).

(E) Cells were arrested with  $\alpha$ -factor and released in YPD or YPD containing 0.2 M HU. Cells were treated for 3 hours and harvested to detect Dun1 and Rad53.

(F) Cells were arrested in G<sub>1</sub> with  $\alpha$ -factor and released into YPD containing 0.2 M HU. After 3 hours, cells were released into YPD. Samples were collected at the indicated times to determine DNA content by fluorescence-activated cell sorting (FACS) analysis (left panel) and to detect Rad53, Dun1, P-H2A and H2A by Western blot analysis (right panel).

**Figure S2, Related to Figure 3. Irc21 interacts with PP2A and PP2A-like phosphatases.**

(A) Top 10 array mutants with highest interactome similarity to *irc21* $\Delta$ . The Pearson correlation (R) value was obtained by comparing the interactome of the *irc21* $\Delta$  array strain with the interactomes of 3884 mutant array strains with the 1712 query mutants (datasets from (Costanzo et al., 2010)). (Related to Figure 3A).

(B) Negative and rescuing genetic interactions of *IRC21* assessed by SGA screening. Left panel: Quantitative effect of array gene deletions (rows) on the growth of *irc21* $\Delta$  mutants vs. wt. Middle panel: Manual functional classification of *IRC21* interactors. Right panel: Comparison with published SGA scores (Costanzo et al., 2010).

**Figure S3, Related to Figure 3. Irc21 interacts with PP2A and PP2A-like phosphatases.**



(A) Epistatic genetic interactions of *IRC21* assessed by SGA screening. Left panel: Quantitative effect of array gene deletions (rows) on the growth of *irc21Δ* mutants vs. wt. Middle panel: Manual functional classification of *IRC21* interactors. Right panel: Comparison with published SGA scores (Costanzo et al., 2010).

(B) Tetrad analysis of *irc21Δ rrd1Δ*, *irc21Δ ptc1Δ*, *irc21Δ rts1Δ*, *irc21Δ tip41Δ*, *irc21Δ sap190Δ* strains (Related to Figure 3D).

(C) Confirmation of the genetic interactions between *Irc21* and *Rrd1*, *Ptc1* and *Rts1* by random spore analysis (spore derived from the SGA screening, performed in S228C genetic background) (Related to Figure 3D).

**Figure S4, Related to Figure 4. PP2A mutants rescue checkpoint defects.**

(A) Cells were grown on SD/-Ura containing glucose 2% or galactose 2% +/- HU.

(B) Cells were grown on YPD plates +/- HU.

(C) Cells were grown on YPD plates +/- rapamycin or metformin.

(D) Cells were treated for 30' with 200ng/ml rapamycin. Bandshift assays following the phosphorylation of PP2A branch proteins *Gln3*, *Nnk1*, and *Npr1*.

**Figure S5, Related to Figure 5. *Irc21* exerts PP2A-dependent and PP2A-activating metabolic regulations.**

(A) Quantification (pmol/mg) of the listed metabolites in wt and *irc21Δ* cells by TrueMass Ceramide analysis. Average values (AVG), standard deviation (SD) and standard error of the mean (SEM) are shown (Related to Figures 5D and E).

(B) TrueMass Ceramide panel quantification of the listed metabolites in *irc21Δ* cells. *p*-value and statistical significance are shown (Related to Figures 5D and E).

(C) Illustration of sphingolipid biosynthesis in *S. cerevisiae*. Colored metabolites indicate an increase (red) or a decrease (green) of their amount in *irc21Δ* cells (refer to Figure S5B). Myriocin inhibits serine palmitoyl-CoA transferase. Fumonisin B1 inhibits ceramide synthase.

(D) Cell sensitivity to syringomycin in presence or absence of dihydroceramide. Cells were grown in SD medium. Average values are shown and error bars represent the standard deviation.

(E) *mec1Δ sml1Δ irc21Δ* cells were arrested in G<sub>1</sub> with  $\alpha$ -factor and released into YPD containing 0.1 M HU. After 3 hours, cells were released into YPD or YPD with ceramide 15 $\mu$ M. Samples were collected at the indicated times to detect Rad53, by Western blot analysis.

**Figure S6, Related to Figure 6. Ceramides, TORC1 and Ppm1 impact on the HU-induced DDR by modulating PP2A activity.**

(A) Cells were treated with 200ng/ml rapamycin. Bandshift assays following the phosphorylation of PP2A branch proteins Gln3, Nnk1, Npr1 and Rtg3, after 30' of rapamycin treatment.

(B) Cells were treated with 0.2M HU alone or in combination with rapamycin 200ng/ml, ceramide 15 $\mu$ M, rapamycin 200ng/ml + ceramide 15 $\mu$ M. Samples were collected at the indicated times to determine DNA content by FACS analysis, to detect Rad53 and Nnk1 by Western blot analysis, to evaluate the budding index.

Figure S1, related to Figure1

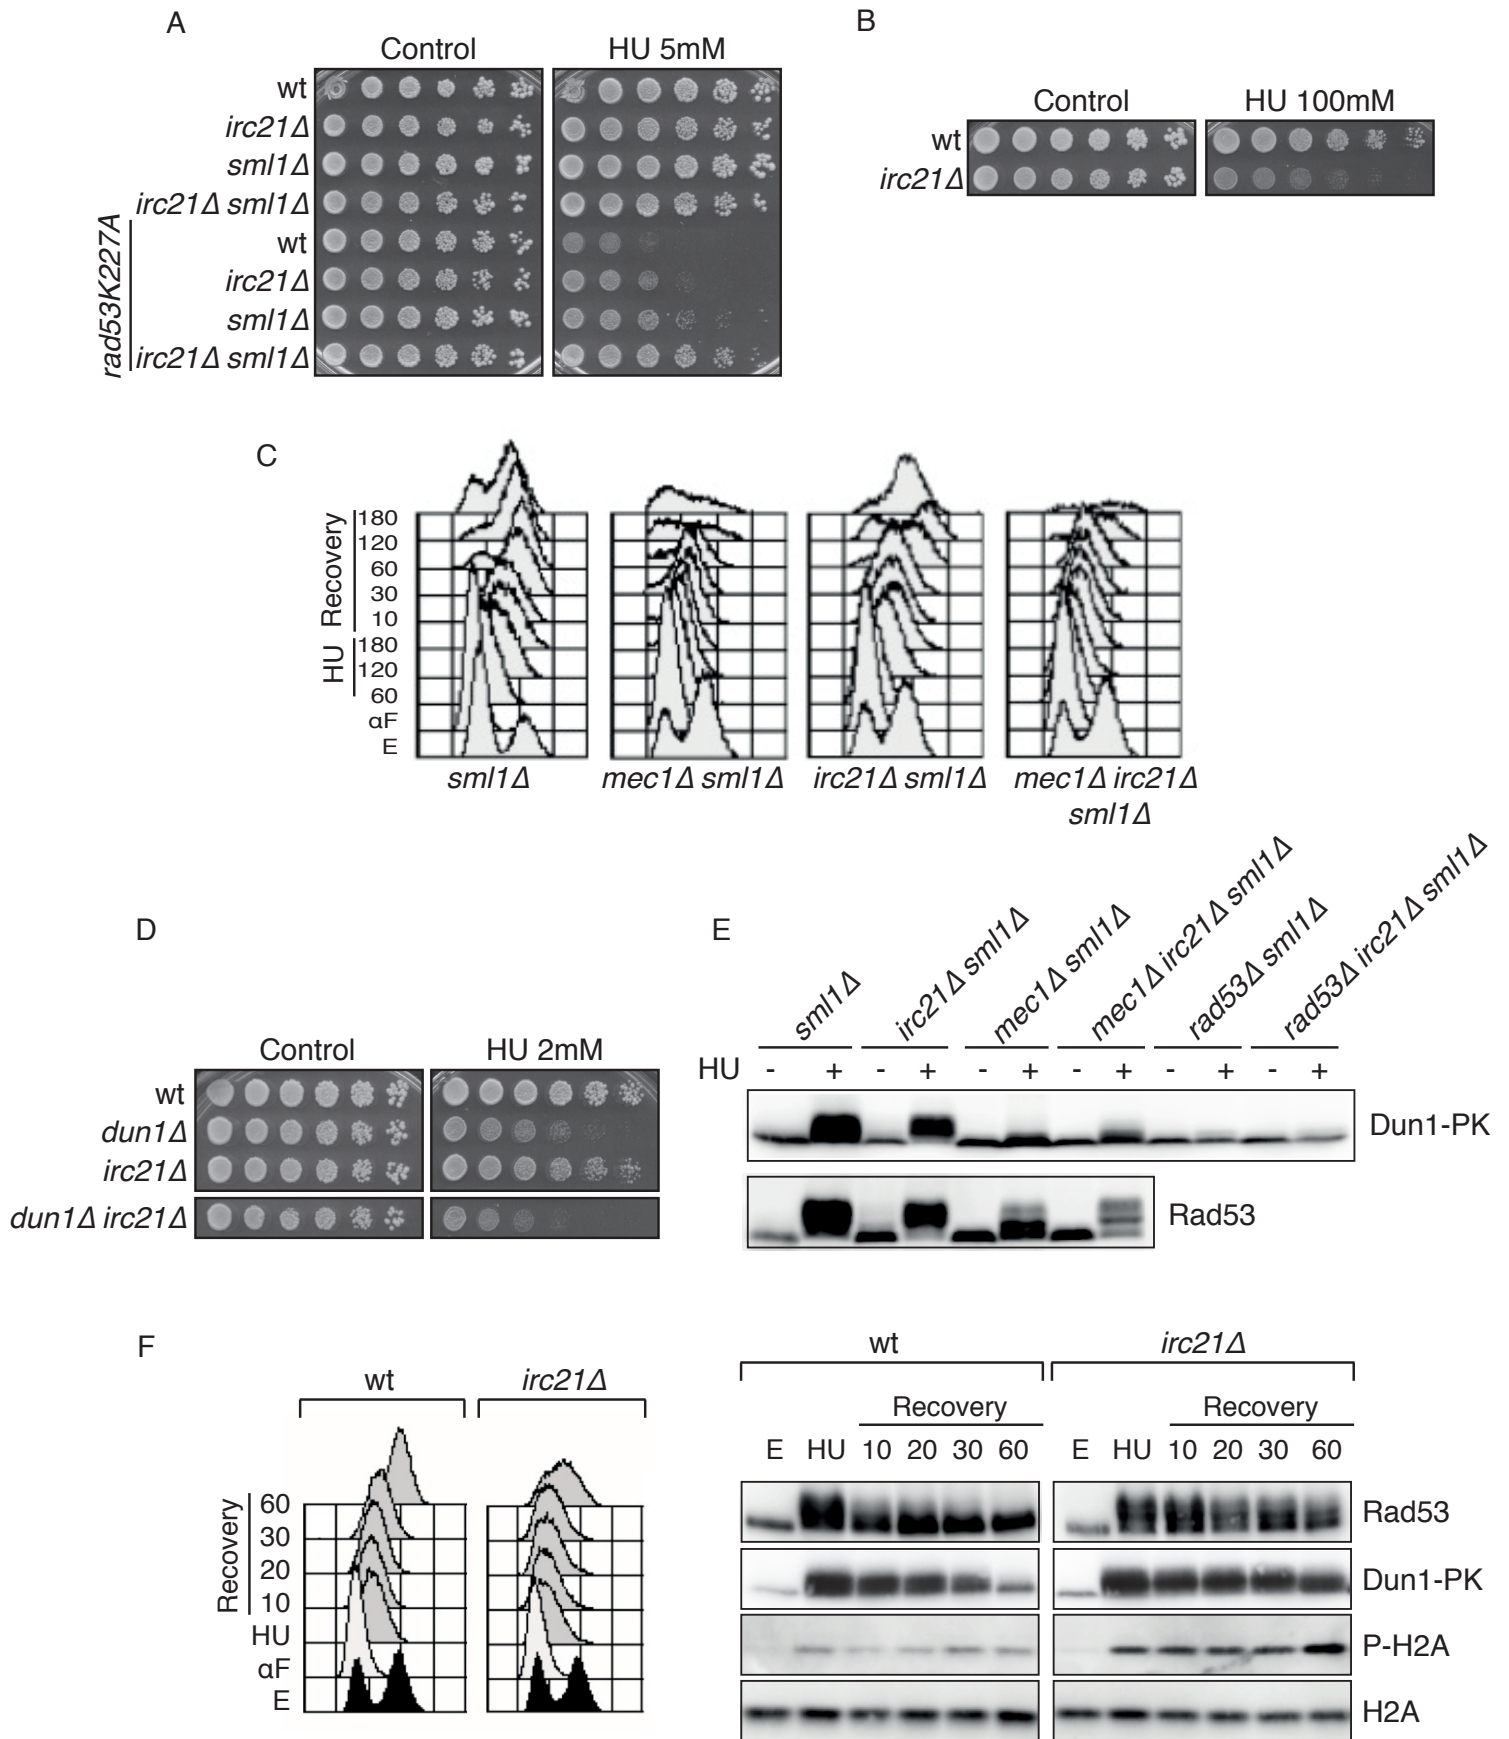

Figure S2, related to Figure 3

A

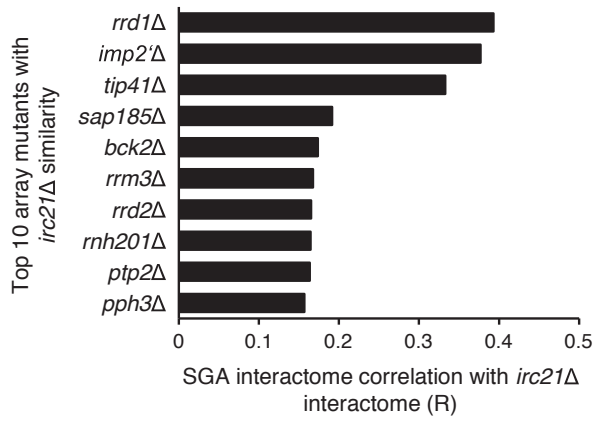

B

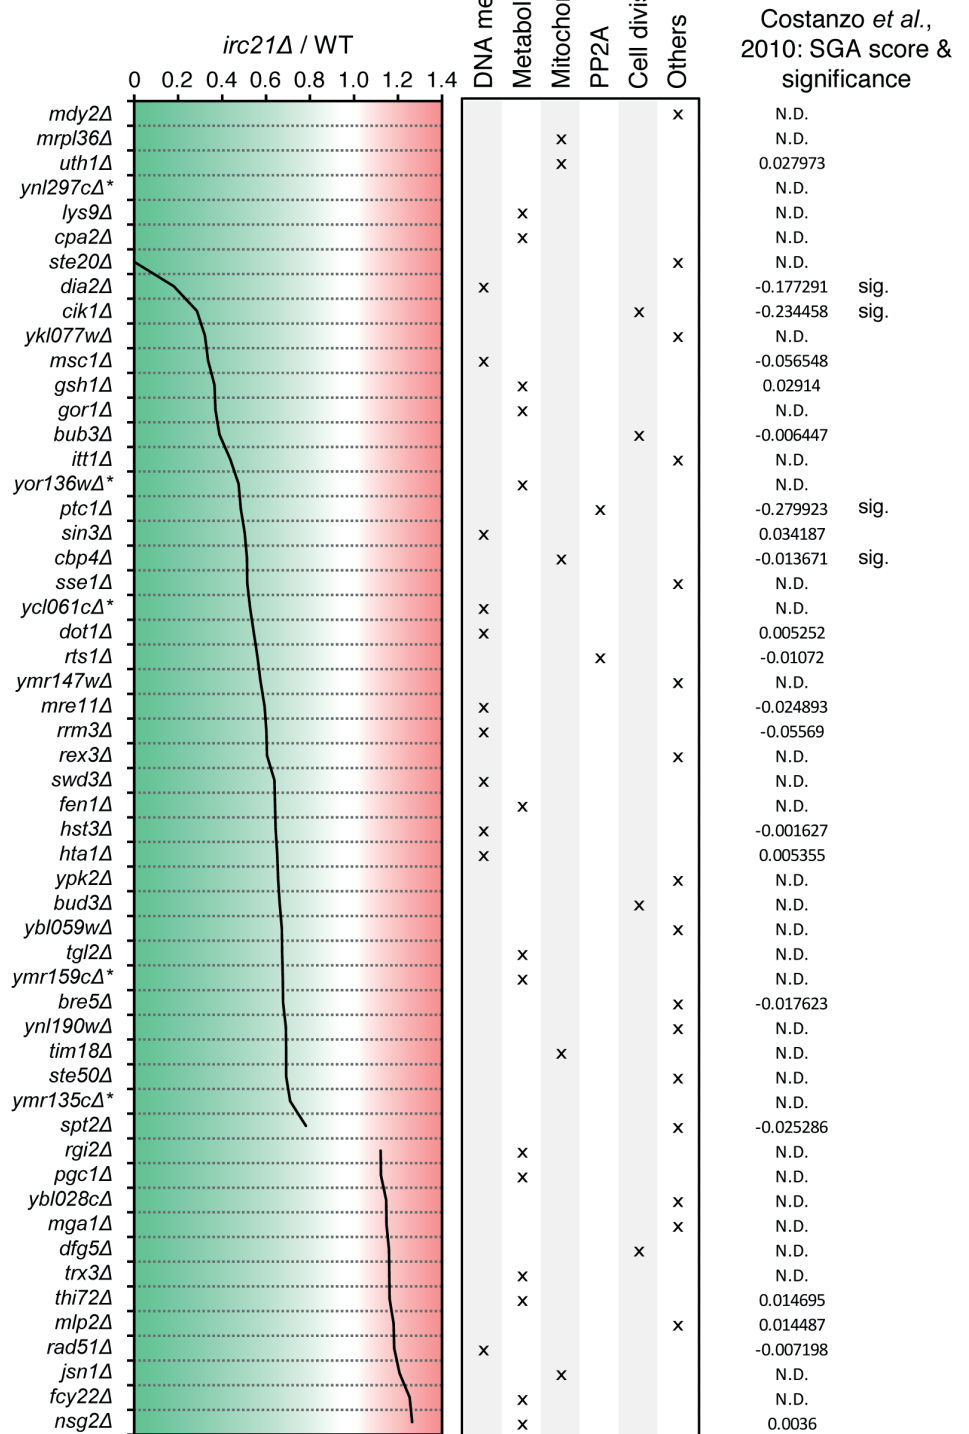

Figure S3, related to Figure 3

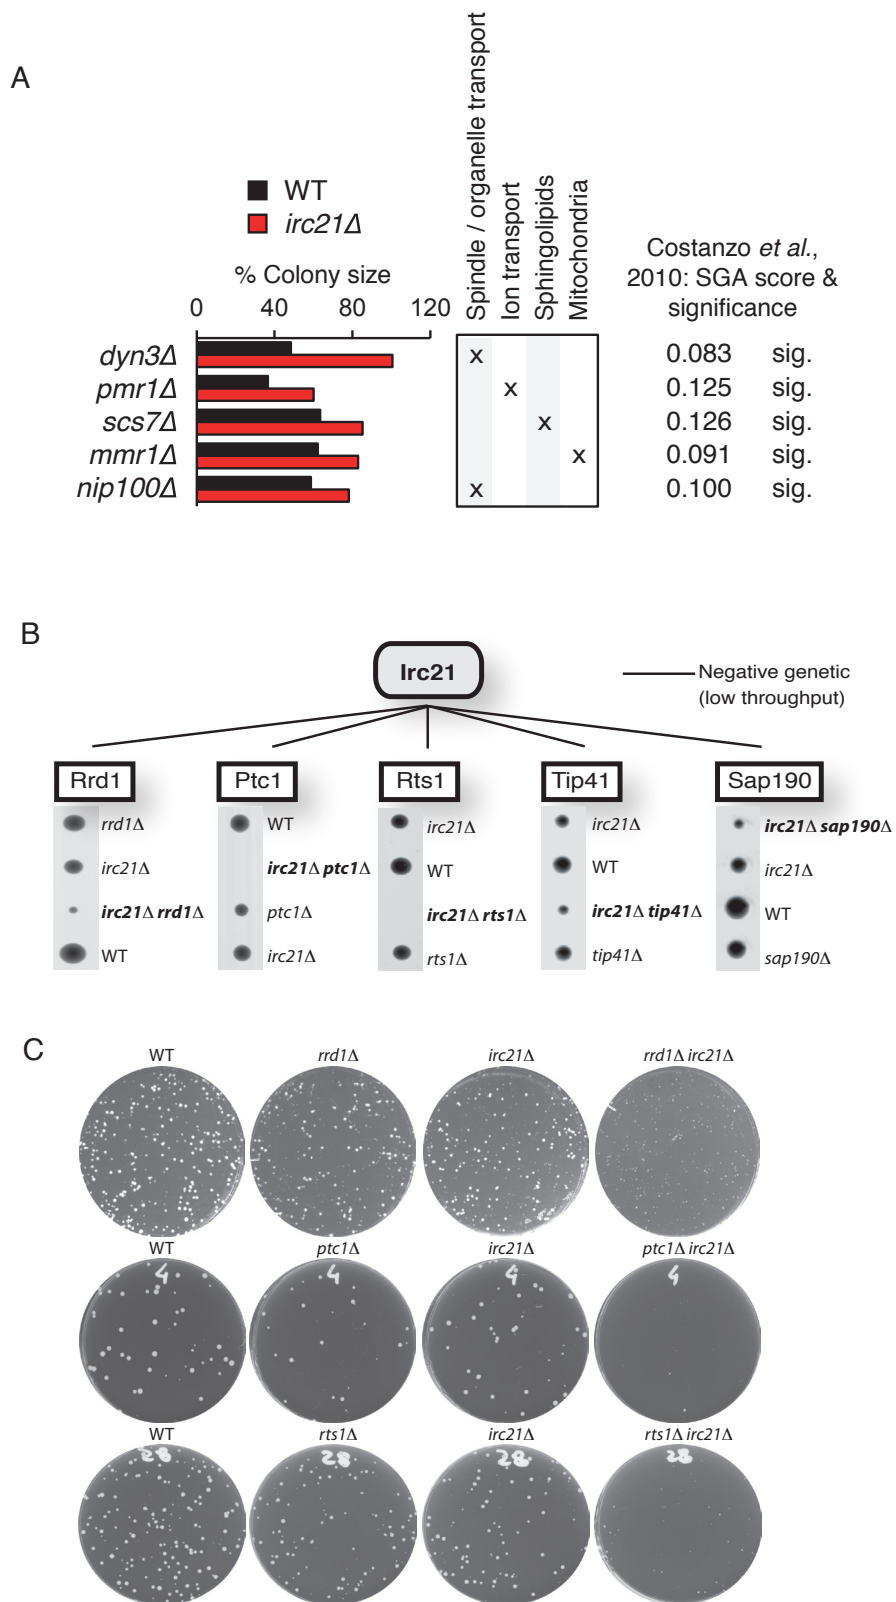

Figure S4, related to Figure 4

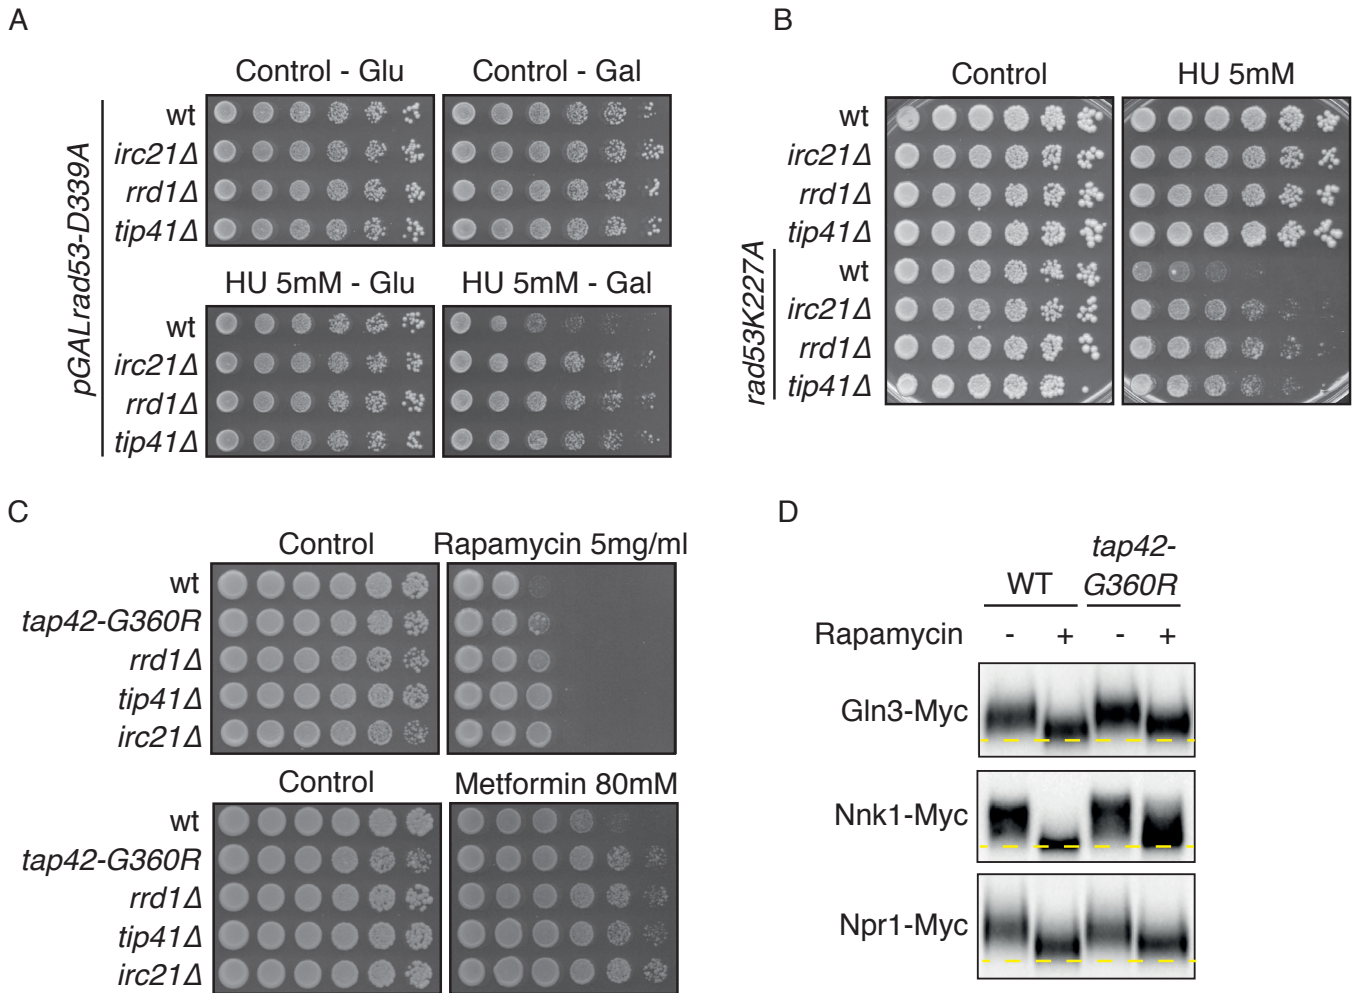

Figure S5, related to Figure 5

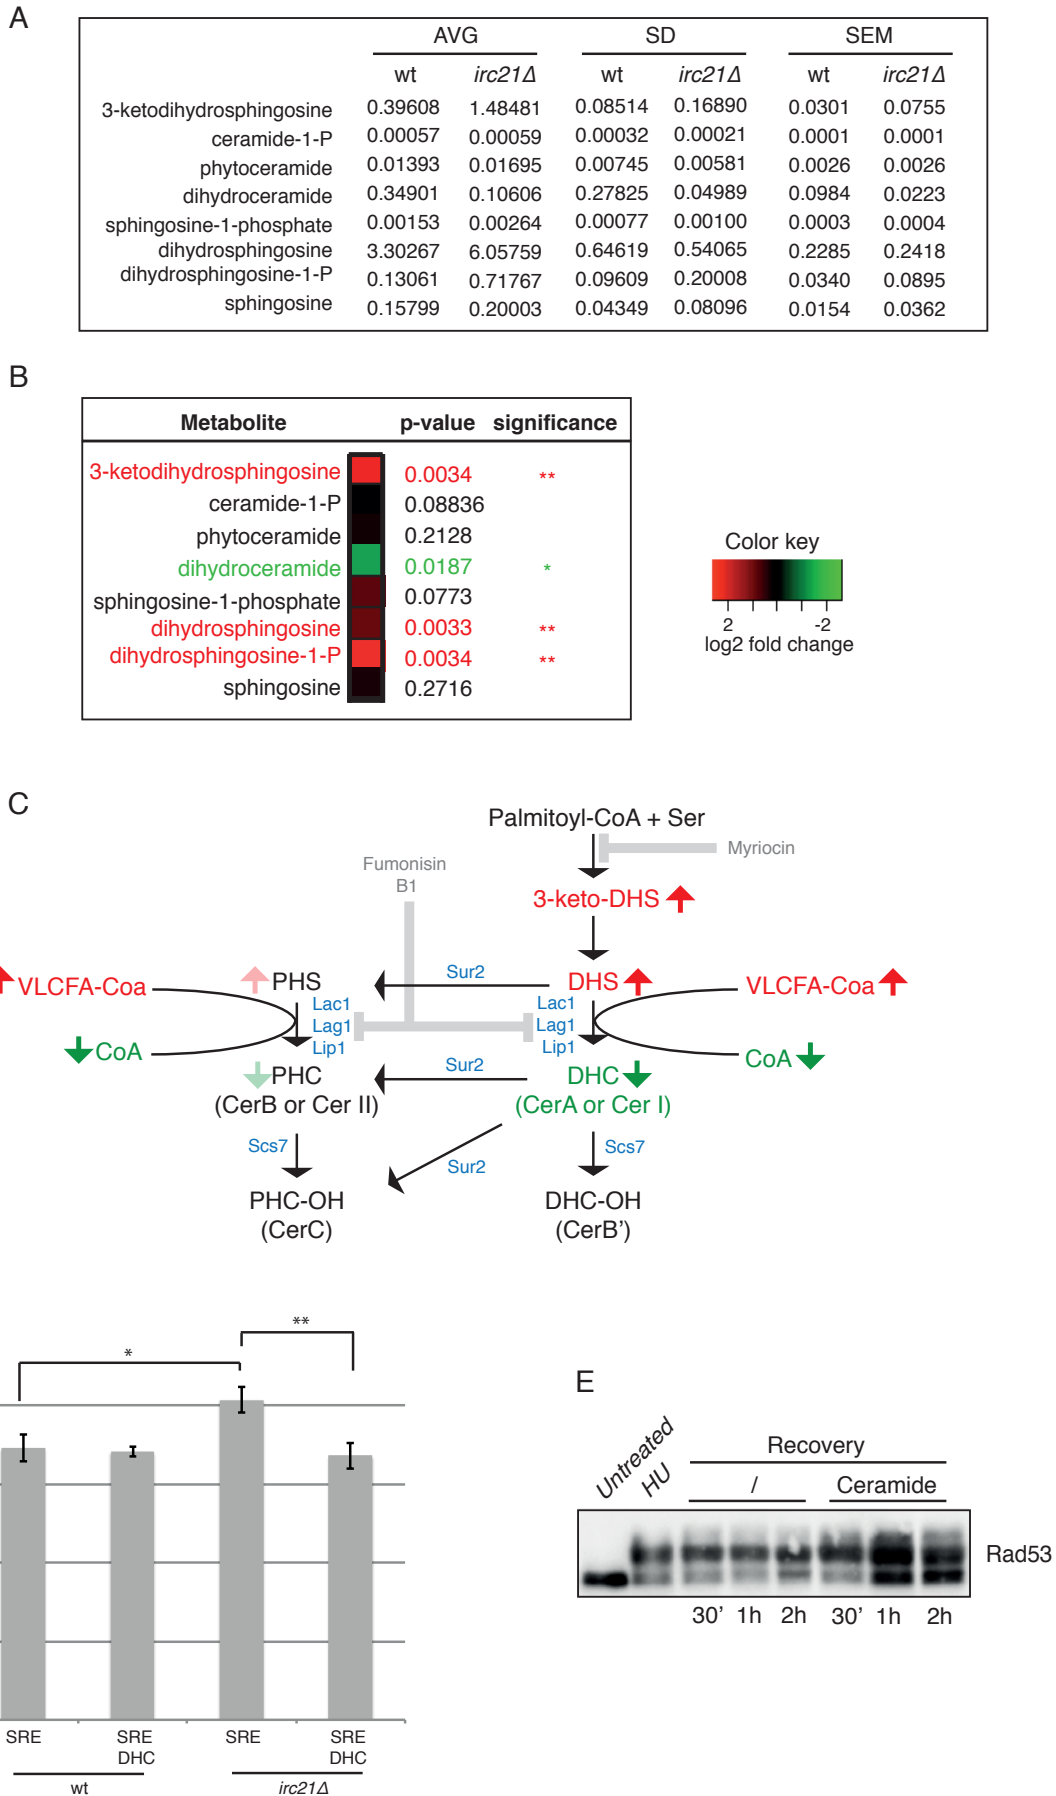

Figure S6, related to Figure 6

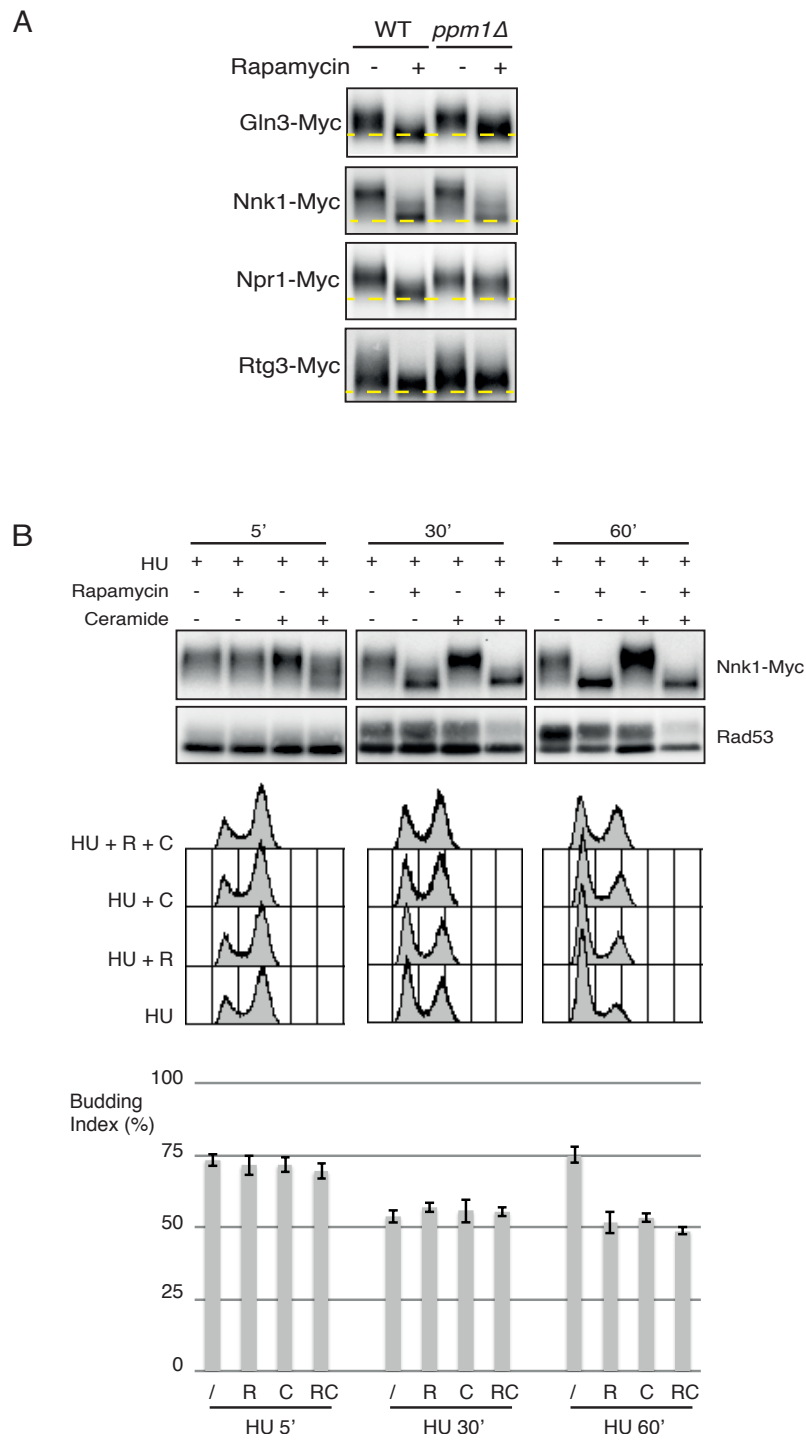

Supplement: mmc4.pdf [file mmc4.pdf]
